# 1 **A long read optimized *de novo* transcriptome pipeline reveals** 2 **novel ocular developmentally regulated gene isoforms and** 3 **disease targets**

4 *Vinay S. Swamy*<sup>1</sup>, *Temesgen D. Fufa*<sup>2</sup>, *Robert B. Hufnagel*<sup>2</sup>, and *David M.*  
5 *McGaughey*<sup>1</sup>✉

6 <sup>1</sup> Bioinformatics Group, Ophthalmic Genetics & Visual Function Branch, National Eye  
7 Institute, Institutes of Health

8 <sup>2</sup> Medical Genetics and Ophthalmic Genomics Unit, National Eye Institute, National  
9 Institutes of Health

10 ✉ Correspondence: [David M. McGaughey <mcgaugheyd@mail.nih.gov>](mailto:mcgaugheyd@mail.nih.gov)

## 11 **Abstract**

12 *De novo* transcriptome construction from short-read RNA-seq is a common method  
13 for reconstructing mRNA transcripts within a given sample. However, the precision of this  
14 process is unclear as it is difficult to obtain a ground-truth measure of transcript  
15 expression. With advances in third generation sequencing, full length transcripts of whole  
16 transcriptomes can be accurately sequenced to generate a ground-truth transcriptome. We  
17 generated long-read PacBio and short-read Illumina RNA-seq data from a human induced  
18 pluripotent stem cell- derived retinal pigmented epithelium (iPSC-RPE) cell line. We use  
19 long-read data to identify simple metrics for assessing *de novo* transcriptome construction  
20 and optimize a short-read based *de novo* transcriptome construction pipeline. We apply  
21 this this pipeline to construct transcriptomes for 340 short-read RNA-seq samples  
22 originating from healthy adult and fetal human retina, cornea, and RPE. We identify  
23 hundreds of novel gene isoforms and examine their significance in the context of ocular  
24 development and disease.

## 25 Introduction

26 The transcriptome is defined as the set of unique RNA transcripts expressed in a  
27 biological system. A single gene can have multiple distinct transcripts, or isoforms, and  
28 there are multiple biological processes that drive the formation of these isoforms including  
29 alternative promoter usage, alternative splicing, and alternative polyadenylation. Gene  
30 isoforms can have distinct and critical functions in biological processes like development,  
31 cell differentiation, and cell migration (Dykes et al., 2018), (Trapnell et al., 2010), (Mitra et  
32 al., 2020). Alternative usage of isoforms has also been implicated in multiple diseases  
33 including cancer, cardiovascular disease, Alzheimer's disease and diabetic retinopathy  
34 (Vitting-Seerup and Sandelin, 2017), (Neago Ciprian et al., 2002), (Mills et al., 2013),  
35 (Perrin et al., 2005).

36 Accurate annotation of gene isoforms is fundamental for understanding their  
37 biological impact. For example, while the Gencode human comprehensive transcript  
38 annotation (release 28) contains 82335 protein coding and 121500 noncoding transcripts  
39 across 19901 genes and 38480 pseudogenes, but this annotation is incomplete (Frankish et  
40 al., 2019), (Zhang et al., 2020). Some of the first high throughput methods to find novel  
41 gene isoforms used short-read (~100bp) RNA-seq to identify novel exon-exon junctions  
42 and novel exon boundaries based solely on RNA-seq coverage (Nagalakshmi et al., 2008).  
43 More recently, several groups have developed specialized tools to use RNA-seq to  
44 reconstruct the whole transcriptome of a biological sample, dubbed *de novo* transcriptome  
45 construction (Haas et al., 2013), (Trapnell et al., 2010), (Pertea et al., 2015).

46 *De novo* transcriptome construction uses short-read RNA-seq to reconstruct full-  
47 length mRNA transcripts. However, a large number of samples are necessary to overcome  
48 the noise and short-read lengths of this type of data. Because of increasingly inexpensive  
49 sequencing cost, datasets of the necessary size are now available. For example, one of the  
50 most comprehensive *de novo* transcriptome projects to date is CHES, which uses the GTEx  
51 data set to construct *de novo* transcriptomes in over 9000 RNA-seq samples from 44  
52 distinct body locations to create a comprehensive annotation of mRNA transcripts across  
53 the human body (GTEx Consortium et al., 2017), (Pertea et al., 2018). However, since the

54 GTEx dataset does not include samples from any ocular tissues, the CHES database  
55 remains an incomplete annotation of the human transcriptome.

56 Despite the increasing number of tools developed, there is no gold standard to  
57 evaluate the precision and sensitivity of *de novo* transcriptome construction on real (not  
58 simulated) biological data. Long-read sequencing technologies provide a potential solution  
59 to this problem as long-read sequencing can capture full length transcripts and thus, can be  
60 used to identify a more comprehensive range of gene isoforms. While previous iterations of  
61 long-read sequencing technologies typically had higher error rates, the new PacBio Sequel  
62 II system sequences long-reads as accurately as short-read based sequencing (Wenger et  
63 al., 2019).

64 We propose that long-read based transcriptomes can serve as a ground truth for  
65 evaluating short-read based transcriptomes. In this study, we used PacBio long-read RNA  
66 sequencing to inform the construction of short-read transcriptomes. We generated PacBio  
67 long-read RNA-seq along with matched Illumina short-read RNA-seq data from a human  
68 induced pluripotent stem cell (iPSC)-differentiated retinal pigmented epithelium (RPE) cell  
69 line. We then designed a rigorous StringTie-based pipeline that maximizes the concordance  
70 between short and long-read *de novo* transcriptomes.

71 Finally, we applied this optimized pipeline to a data set containing 340 human  
72 ocular tissue samples compiled from mining previously published, publicly available short-  
73 read RNA-seq data (Swamy and McGaughey, 2019). We built transcriptomes for three  
74 major ocular tissues: cornea, retina, and RPE, using RNA-seq data from both adult and fetal  
75 tissues to create a high-quality pan-eye transcriptome. In addition to ocular samples, we  
76 used a subset of the GTEx data set to construct transcriptomes for tissues in 44 other  
77 locations across the body.

78 We used our gold-standard informed pan-eye *de novo* transcriptome to reveal  
79 hundreds of novel gene isoforms in the eye and analyze their potential impact on ocular  
80 biology and disease. We provide transcript annotation derived from our *de novo*  
81 transcriptomes as a resource to other researchers through an R package.

## 82 Results

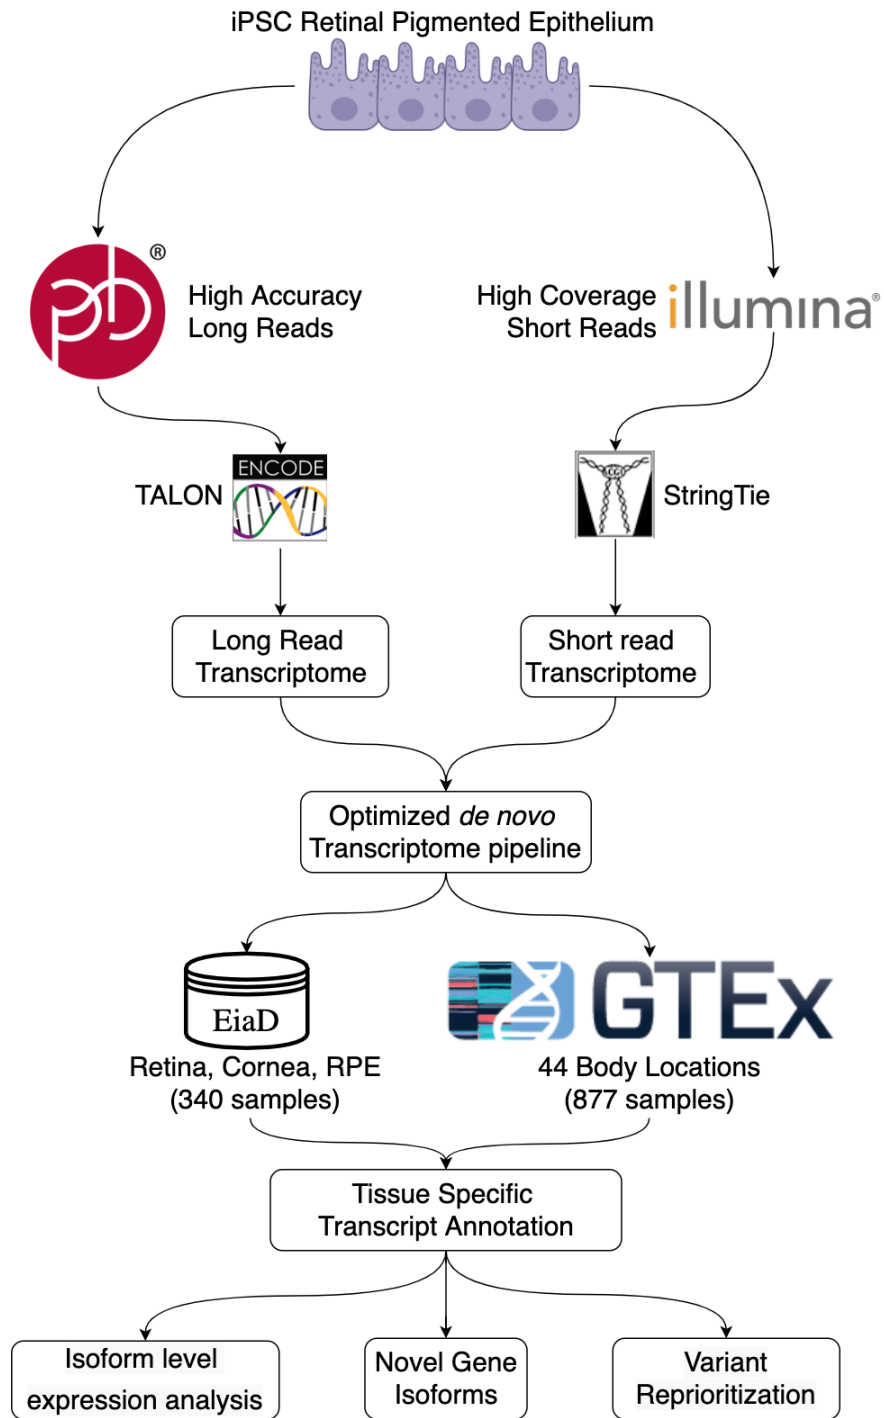

83

84

85

Figure 1. Workflow for long-read informed *de novo* transcriptome construction and analysis

86 **Long-read PacBio RNA sequencing guides short-read *de novo* transcriptome**  
87 **construction**

88 To evaluate the accuracy of short-read transcriptome construction, we first  
89 generated PacBio long-read RNA-seq data and Illumina short-read RNA-seq data from iPSC-  
90 RPE (Fig 1). These cells were differentiated using an optimized protocol, and thus minimal  
91 biological variation is expected (Blenkinsop et al., 2015), (Maruotti et al., 2015). We used  
92 these sequencing data to construct a long-read transcriptome and a short-read  
93 transcriptome. In our long-read transcriptome we found 1163239 distinct transcripts, and  
94 in our short-read transcriptome 366888 distinct transcripts

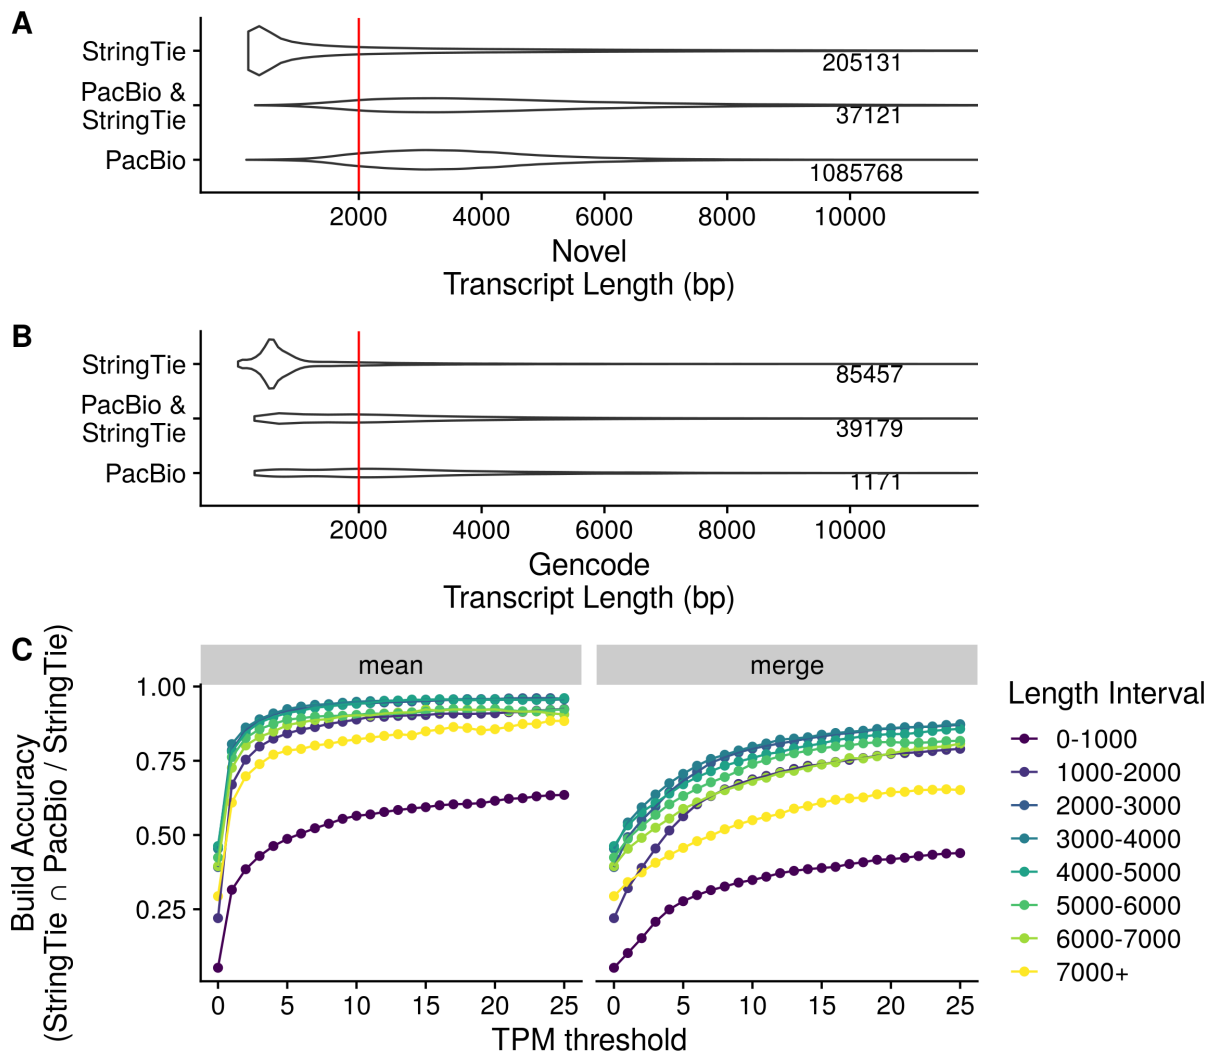

96 Figure 2. Transcript length and expression dictate transcriptome  
97 construction accuracy. A,B) Distributions of novel(A) and previously  
98 annotated(B) transcript lengths between PacBio (long-read) and Stringtie  
99 (short-read) transcriptomes. Each distribution is labeled with the total  
100 number of transcripts in the distribution C) short-read construction  
101 accuracy stratified by transcript length at different Transcripts Per Million  
102 (TPM)-based transcript exclusion thresholds. The “merge” method follows  
103 the protocol for constructing transcriptomes outlined by the StringTie  
104 authors and keeps any transcripts expressed above a specific TPM  
105 threshold in at least one samples. The “mean” method used by our pipeline  
106 keeps transcripts whose average expression across all samples is above a  
107 specific TPM threshold.

108 In our initial comparison between short and long-read transcriptomes, we noticed a  
109 low transcriptome construction accuracy (see Methods) of 0.208. When we examined the  
110 transcript lengths of each build we saw that the two methods show very different  
111 transcript length distributions for both novel and previously annotated transcripts, with  
112 the short-read build was comprised mostly of smaller transcripts (Fig 2A). As the PacBio  
113 data was generated using two different libraries for 2000 bp and >3000 bp transcripts, we  
114 expected an enrichment for longer transcripts in the PacBio data set (Supplemental Figure  
115 2). To assess accuracy relative to transcript length, we grouped transcripts by length in  
116 1000 bp intervals, and compared accuracy between each group. We found that accuracy  
117 significantly improves for transcripts longer than 2000 bp. The construction accuracy is  
118 0.426 and 0.137 for transcripts above and below 2000 bp, respectively.

119 We experimented with various methods to remove spurious transcripts and  
120 improve construction accuracy. We first removed transcripts that were expressed <1 TPM  
121 in at least one sample as outlined in StringTie’s recommended protocol (Pertea et al.,  
122 2016). This improved construction accuracy to 0.475 for transcripts longer than 2000bp  
123 and 0.212 for transcripts shorter than 2000bp. As this accuracy was still fairly low, we tried  
124 different filtering schemes, including experimenting with machine learning-based  
125 strategies to identify transcripts that were computational artifacts (data not shown), but  
126 we found that the simplest approach with high performance was to retain transcripts that  
127 had an average TPM above a specific threshold(Fig 2C). In our downstream pipeline we  
128 keep transcripts that have at least an average of 1 TPM across all samples of the same  
129 subtissue type as this threshold achieved a build accuracy of 0.772 for transcripts longer  
130 than 2000Bp and retained 48470 transcripts within this short-read RPE dataset.

131 **Thousands of novel gene isoforms are detected in human subtissue-specific**  
132 **transcriptomes**

| Tissue | Source | Samples | Studies | Transcriptome Count |
|--------|--------|---------|---------|---------------------|
| RPE    | Adult  | 48      | 4       | 32012               |
| RPE    | Fetal  | 49      | 7       | 49967               |
| Retina | Adult  | 105     | 8       | 49714               |
| Retina | Fetal  | 89      | 6       | 66255               |
| Cornea | Adult  | 43      | 6       | 51469               |
| Cornea | Fetal  | 6       | 2       | 59408               |

133 Table 1. Ocular sample dataset overview and transcriptome count.  
134 Transcriptome count is defined as the number of unique transcripts  
135 expressed in a given tissue type

136 We built transcriptomes from 340 publicly available ocular tissue RNA-seq samples  
137 curated in EiaD using an efficient Snakemake pipeline (Köster and Rahmann, 2012). We  
138 included both publicly collated non-disease, non-perturbed adult and fetal samples from  
139 cornea, retina, and RPE tissues, mined from 29 different studies (Table 1). Our fetal tissues  
140 consist of both human fetal tissues and human iPSC-derived tissue, as stem cell-derived  
141 tissue has been showed to closely resemble fetal tissue. We include our iPSC-RPE samples  
142 originally used to develop our pipeline within this larger set of fetal RPE samples.  
143 (Klimanskaya et al., 2004). To more accurately determine the tissue specificity of novel  
144 ocular transcripts, we supplemented our ocular data set with 877 samples from 44 body  
145 locations across 22 major tissues from the GTEx project and constructed transcriptomes  
146 for each of these body locations (GTEx Consortium et al., 2017). We refer to each distinct  
147 body location as a subtissue here after.

148 After initial construction of transcriptomes, we found 183442 previously annotated  
149 transcripts and 6241675 novel transcripts detected in at least one of our 1217 samples. We  
150 define a novel transcripts as all transcripts whose set of exons and introns do not exactly  
151 match that of an annotated transcript within the Gencode, Ensembl, UCSC, and Refseq  
152 annotation databases (Frankish et al., 2019), (Zerbino et al., 2018), (O’Leary et al., 2016).  
153 After using the filtering methods described above, we merged all subtissue specific  
154 transcriptomes into a single final transcriptome which contains 252983 distinct transcripts  
155 with 87592 previously annotated and 165391 novel transcripts, and includes 114.9

156 megabases of previously unannotated genomic sequence (Table 1). We refer to the final  
157 pan-body transcriptome as the DNTX annotation hereafter.

158           We split novel transcripts into two categories: novel isoforms, which are novel  
159 variations of known genes, and novel loci, which are previously unreported, entirely novel  
160 regions of transcribed sequence (Fig 3B). Novel isoforms are further classified by the  
161 novelty of their encoded protein: isoforms with novel open reading frame, novel isoforms  
162 with a known ORF, and isoforms with no ORF as noncoding isoforms (Fig 3A). The number  
163 of distinct ORFs was significantly less than the number of transcripts, with 43279  
164 previously annotated ORFs and 46226 novel ORFs across all subtissues. Furthermore,  
165 across all subtissues there was an average of 10393 novel isoforms and 3716 novel ORFs.



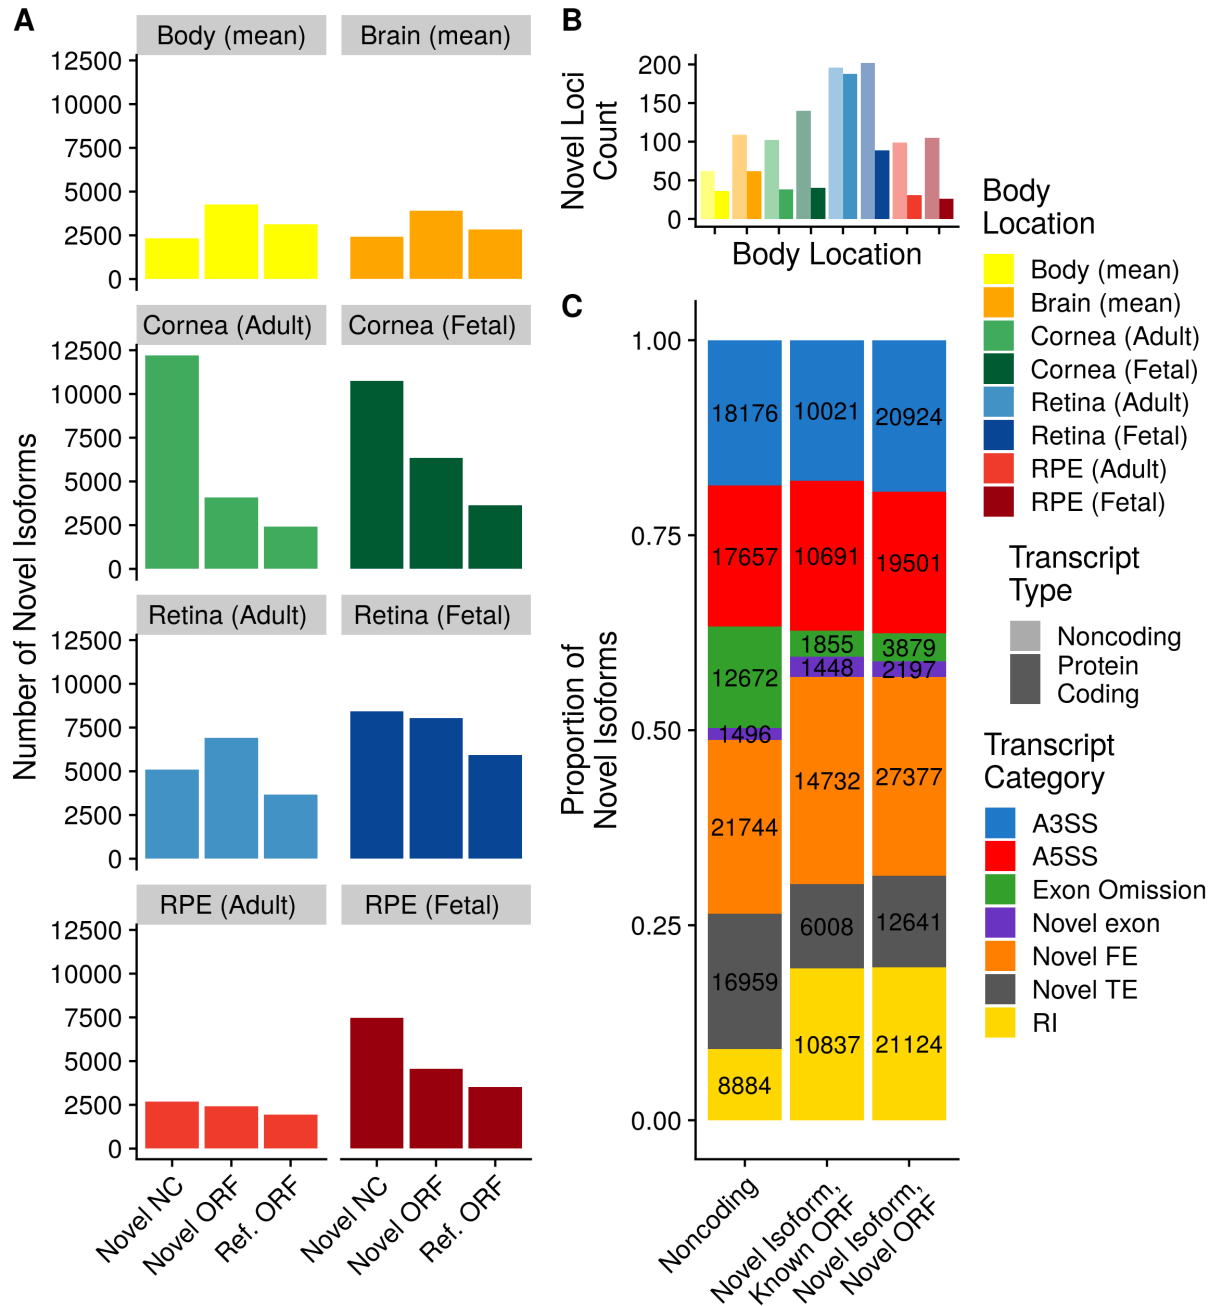

166

167  
168  
169  
170  
171  
172

Figure 3. Overview of novel isoforms. A) Number of novel gene isoforms, grouped by transcript type. Brain and body represent an average of 13 and 34 distinct subtissues, respectively. B) Novel protein coding and noncoding loci. Novel exon composition of novel isoforms, by isoform type. Labels indicate number of transcripts. C) Classification of novel exon types, stratified by novel isoform type.

173 Novel isoforms can occur due to an omission of a previously annotated exon,  
174 commonly referred as exon skipping or the addition of an unannotated exon which we  
175 refer to as a novel exon. We further classified novel exons by the biological process that  
176 may be driving their formation: alternative promoter usage driving the addition of novel  
177 first exons (FE), alternative polyadenylation driving the addition of novel terminal exons  
178 (TE), and alternative splicing driving the formation of all novel exons that are not the first  
179 or last exon (Landry et al., 2003), (Tian and Manley, 2017), (Wang et al., 2015). We then  
180 split alternatively spliced exons into their commonly seen patterns, alternative 5' splice site  
181 (A5SS), alternative 3' splice site (A3SS), and retained introns (RI). Exons whose entire  
182 sequence was unannotated and is not a retained intron are fully novel exons. We note that  
183 all three of these mechanisms can lead to exon skipping, so for simplicity we grouped all  
184 novel isoforms resulting from exon skipping together. We found that the majority of novel  
185 exons within our dataset are novel FEs. We noticed that the majority of RI exons lead to  
186 novel ORFs, whereas novel isoforms with omitted exons more often lead to noncoding  
187 isoforms. (Fig 3C)

### 188 ***De novo* transcriptomes match previously published experimental data better**

### 189 **than existing annotation**

190 We validated *de novo* transcriptomes using three independent approaches. We first  
191 looked for evolutionary conservation since it is commonly accepted as a proxy for  
192 functional significance. We used the PhyloP 20 way species alignment, a measure of  
193 conservation between species, to calculate the average conservation score for each exon in  
194 the DNTX annotation and compared that to the average conservations score for each exon  
195 in the Gencode annotation (Pollard et al., 2010). We found that, on average, exons in the  
196 DNTX annotation are more conserved than exons in the Gencode annotation (pvalue <2.2e-  
197 16) (Supplemental Figure 2A).

198 Next, since we observed an enrichment in novel first and last exons within our data  
199 set, we decided to compare the TSS and TES within the DNTX annotation to two well-  
200 established annotation databases from FANTOM and the polyA Atlas (Noguchi et al., 2017),  
201 (Herrmann et al., 2020). We compared DNTX and Gencode TSS's to CAGE-seq data from the  
202 FANTOM consortium; as CAGE-seq is optimized to detect the 5' end of transcripts, we

203 reasoned that it can serve as a valid ground truth set to evaluate TSS detection (Takahashi  
204 et al., 2012). We calculated the absolute distance of DNTX TSS's to CAGE peaks, and  
205 compared them to the absolute distance of Gencode TSS's to CAGE peaks. We found that, on  
206 average, DNTX TSS's were closer to CAGE peaks than Gencode TSS's (pvalue <2.2e-  
207 16)(Supplemental Figure 2B).

208 Finally, we evaluated TES's using the polyA Atlas, which is comprised of  
209 polyadenylation signal annotation generated from aggregating 3' seq data from multiple  
210 studies. As 3'-seq data is designed to accurately capture the 3' ends of transcripts, it can  
211 similarly serve as a ground truth set to evaluate the accuracy of TES's (Beck et al., 2010).  
212 We calculated the absolute distance of DNTX TES's to annotated polyA signals and  
213 compared them to the absolute distance of Gencode TES's to polyA signals. We found that  
214 on average DNTX TES's are closer to annotated polyadenylation signals than gencode TSS's  
215 (pvalue <2.2e-16) (Supplemental Figure 2C)

## 216 ***De novo* transcriptomes reduce overall transcriptome sizes**

217 *De novo* transcriptomes removed on average 76.141 % of a subtissue's base  
218 transcriptome. We defined base transcriptome for a subtissue as any transcript in the  
219 Gencode annotation with non-zero TPM in at least one sample of a given subtissue. This  
220 was a large reduction in transcriptome size and we wanted to ensure that we were not  
221 unduly discarding data. We quantified transcript expression of each sample using Salmon  
222 with two methods: once using the full gencode v28 human transcript annotation, and once  
223 using its associated subtissue specific transcriptome. We found that despite the 76.141 %  
224 reduction in number of transcripts between the base gencode and *de novo* transcriptomes  
225 (Supplemental Figure 3A), the per-sample Salmon mapping rate increased on average by  
226 2.041 % indicating that the vast majority of gene expression data is retained within our  
227 transcriptome (Supplemental Figure 3B).

## 228 Novel Isoforms are identified in ocular tissues

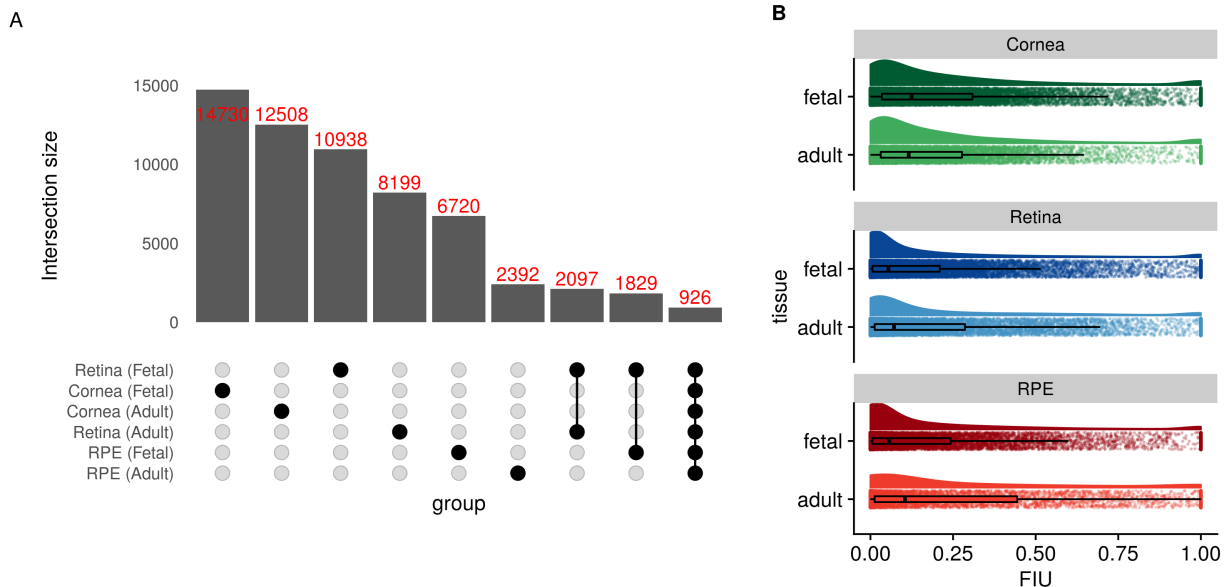

229

230 Figure 4. Overview of novel gene isoforms in the eye. A) Set intersection of  
231 novel isoforms in ocular transcriptomes. B) Boxplots of fraction isoform  
232 usage (FIU) overlaid over FIU data points with estimated distribution of  
233 data set above each boxplot.

234 Using the pan-eye transcriptome, we compared the overlap in constructed novel  
235 isoforms across ocular subtissues and found that 77.968 % of novel isoforms are specific to  
236 a singular ocular subtissue (Fig 4A). Additionally, fetal-like tissues had more novel isoforms  
237 that their adult counterpart. For each novel isoform we then calculated fraction isoform  
238 usage (FIU), or the fraction of total gene expression a transcript contributes to its parent  
239 gene. We found that, on average, novel isoforms contributed to 20.584 % of their parent  
240 gene's expression but in each subtissue we found multiple novel isoforms that contribute  
241 to the majority of their parent genes expression (Fig 4B)

## 242 Differential usage of gene isoforms occurs during retinal development

243 Multiple studies have shown that gene isoforms play a significant role in eye  
244 development (Bharti et al., 2008), (Mellough et al., 2019). We hypothesized that the DNTX  
245 annotation provides additional insight into alternative isoform usage and identifies novel  
246 gene isoforms potentially involved in eye development. We used RNA-seq data of the  
247 developing retina from Mellough et al, an independent data set that we did not include for

248 transcriptome construction, and used a subset of the DNTX annotation corresponding to  
249 fetal retina to quantify transcript expression and identify transcripts with significant  
250 changes in expression across retinal development. Transcripts that are differentially  
251 expressed (qvalue <.01) and have a mean FIU difference of .25 in at least one comparison of  
252 time points are indicative of differential transcript usage (DTU).

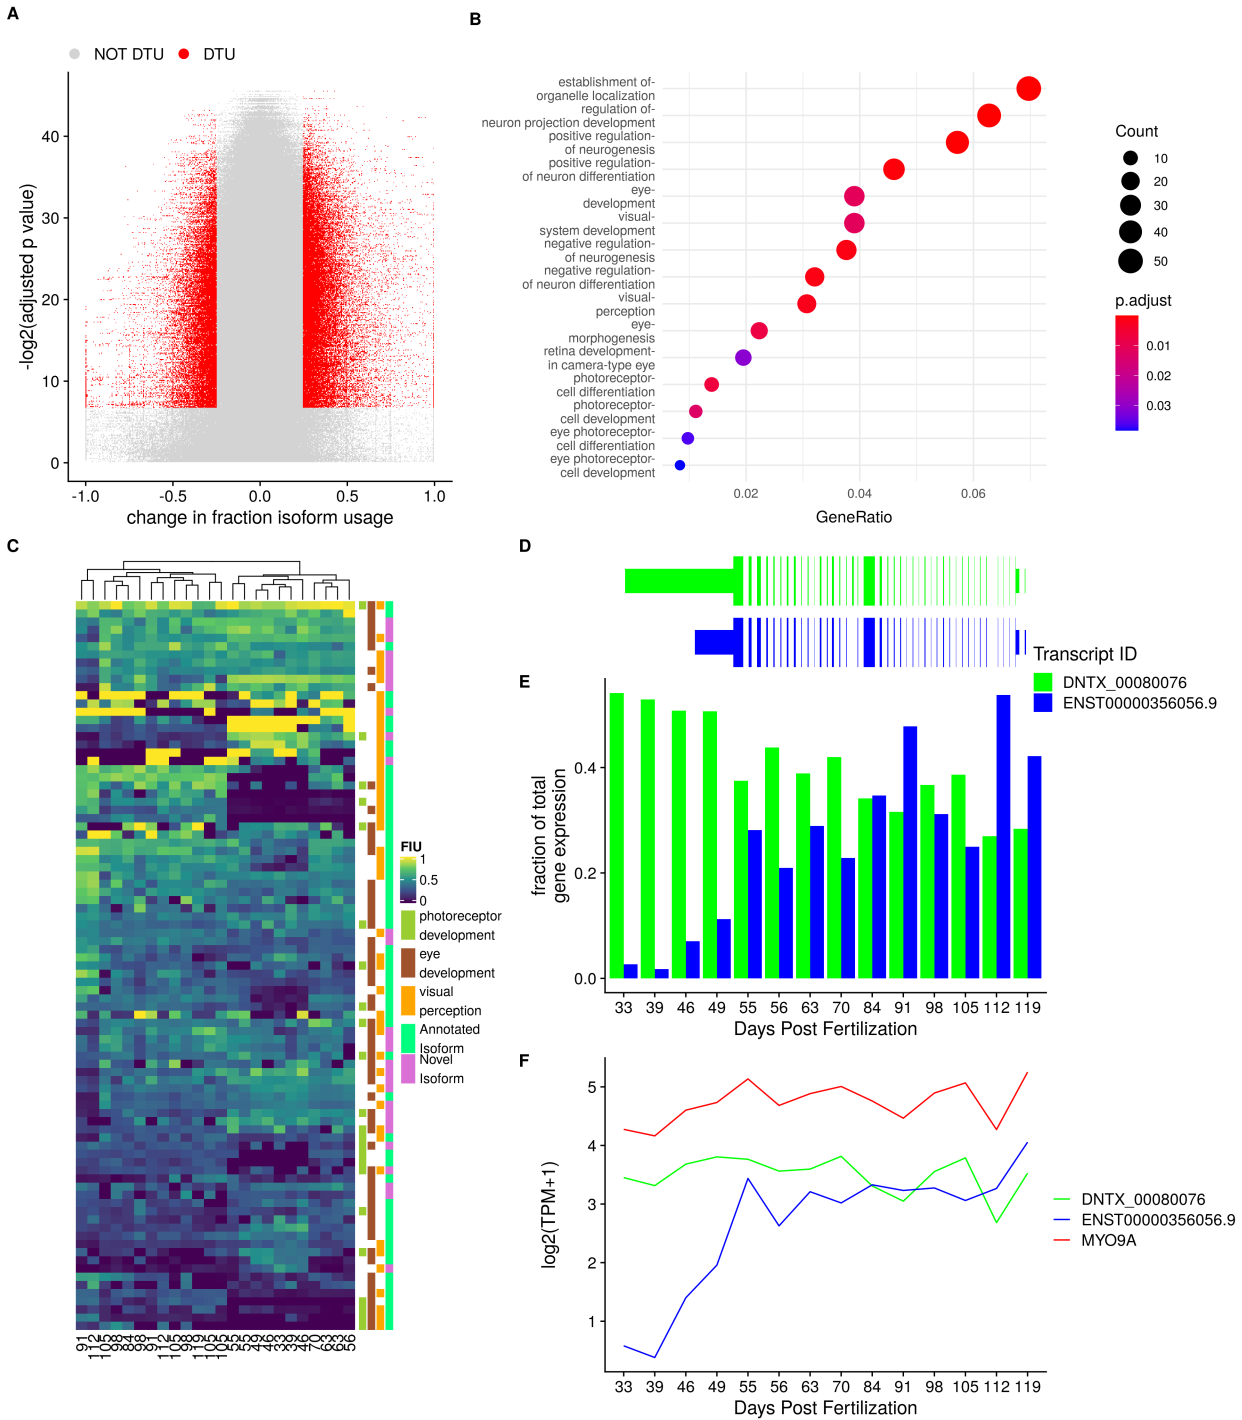

253

254

255

256

257

258

259

260

Figure 5 Differential Transcript usage during retinal development. A) Volcano plot of tested transcripts B) Dot plot for gene set enrichment analysis C) Heatmap of hierarchical clustering of transcripts with DTU associated with eye development D) Transcript models for *MYO9A*, a gene undergoing DTU E) FIU change in *MYO9A* FIU across development F) average log<sub>2</sub>-transformed TPM expression of *MYO9A* across retinal development

261 We analyzed 24 samples across 14 developmental days post fertilization and found  
262 1717 transcripts across 812 genes displaying DTU (Fig 5A). We found that genes involved  
263 in DTU are enriched( $q$ value  $<.05$ ) for genes related to eye and neurological development  
264 (Fig 5B), and that hierarchical clustering of DTU transcripts generates an early stage and  
265 late stage cluster (Fig 5C). One of these genes, *MYO9A*, is a classical example of DTU. *MYO9A*  
266 is associated with the visual perception GO term, plays a role in ocular development, and  
267 has been associated with ocular disease (Gorman et al., 1999). While expression of *MYO9A*  
268 remains relatively unchanged across development, expression of two of its associated  
269 isoforms in fetal retina (Fig 5D) changes dramatically during development: a novel isoform  
270 is highly expressed early during development, but switched to the canonical isoform later  
271 in development (Fig 5E,F). This novel isoform contains a novel exon within the protein  
272 coding region of the isoform as well as novel last exon extending the 3' UTR (Fig 5d). A full  
273 list of genes and transcripts displaying DTU is available in Supplemental Data  
274 (Supplemental Data 4).

### 275 ***De novo* transcriptomes allow for a more precise variant prioritization.**

276 The identification of a disease-causing variant through genome sequencing is a  
277 common step in diagnosing genetic disease, when disease causing variants cannot be  
278 determined from exonic sequencing. Prediction of a variant's biological impact and  
279 subsequent variant prioritization is a fundamental step in this process. Many methods for  
280 predicting variant effects on protein function or gene expression are based on location  
281 within the body of a transcript; for example variants that disrupt splice sites and start/stop  
282 codons are considered to be the most damaging, while variants within intronic and  
283 intergenic regions have unknown impact or are not classified, and, thus, are not included  
284 for further consideration. However, multiple studies have identified pathogenic deep  
285 intronic variants for retinal dystrophies (Braun et al., 2013), (Bauwens et al., 2019),  
286 (Zernant et al., 2014), (Sangermano et al., 2019), (Jamshidi et al., 2019), (Mayer et al.,  
287 2016), (Geoffroy et al., 2018). Pathogenic intronic variants are thought to function by  
288 introducing a novel splice site, disrupting regulatory motifs, or altering a tissue-specific  
289 transcript. To explore this third possibility, we mapped known pathogenic intronic variants  
290 onto novel isoforms within the *de novo* transcriptomes.

| Gene Name | Associated Disease                              | Location (hg19)       | Canonical Variant HGVS          | Gencode Predicted Consequence                                                                                                                               | DNTX Predicted Consequence               | Published Study                       |                   |
|-----------|-------------------------------------------------|-----------------------|---------------------------------|-------------------------------------------------------------------------------------------------------------------------------------------------------------|------------------------------------------|---------------------------------------|-------------------|
| ABCA4     | ABCA4-associated maculopathy                    | Chr1:94481967<br>C>T  | c.5197-557G>T,<br>NM_000350.2   | intron variant,<br>downstream gene variant                                                                                                                  | 5 prime UTR variant                      | Bauwens et al.                        |                   |
|           |                                                 | Chr1:94546814<br>G>C  | c.859-540C>G,<br>NM_000350.2    | intron variant                                                                                                                                              | non coding transcript<br>exon variant    |                                       |                   |
|           | Stargardt disease                               | Chr1:94484001<br>C>T  | c.5196+1137G><br>A, NM_000350.2 | intron variant,<br>downstream gene variant                                                                                                                  | 5 prime UTR variant                      | Braun et al.<br>Zernant et al.        |                   |
|           |                                                 | Chr1:94484082<br>T>G  | c.5196+1056A><br>G, NM_000350.2 | intron variant,<br>downstream gene variant                                                                                                                  | 5 prime UTR variant                      |                                       |                   |
|           |                                                 | Chr1:94526934<br>T>G  | c.1938-619A>G,<br>NM_000350.2   | intron variant,<br>splice region variant,<br>non coding transcript<br>variant                                                                               | non coding transcript<br>exon variant    |                                       | Zernant et al.    |
|           |                                                 |                       | Chr1:94527698<br>G>C            | c.1937+435C>G,<br>NM_000350.2                                                                                                                               | intron variant,<br>upstream gene variant | non coding transcript<br>exon variant | Sangermano et al. |
|           |                                                 |                       | Chr1:94546780<br>C>G            | c.859-506G>C,<br>NM_000350.2                                                                                                                                | intron variant                           | non coding transcript<br>exon variant |                   |
| IFT140    | Ciliopathy                                      | Chr16:1576595<br>C>A  | c.2577+25G>A,<br>NM_014714.3    | upstream gene variant,<br>intron variant,<br>NMD transcript variant,<br>non coding transcript<br>exon variant,<br>non coding transcript<br>variant          | missense variant                         | Geoffroy et al.                       |                   |
| PROM1     | Cone-rod dystrophy                              | Chr4:15989860<br>T>G  | c.2077-521A>G,<br>NM_006017.2   | intron variant,<br>upstream gene variant                                                                                                                    | 5 prime UTR variant                      | Mayer et al.                          |                   |
| RPGRIP1   | RPGRIP1-mediated inherited retinal degeneration | Chr14:21789588<br>G>A | c.1611+27G>A,<br>NM_020366.3    | intron variant,<br>non coding transcript<br>variant,<br>upstream gene variant,<br>synonymous variant,<br>NMD transcript variant,<br>downstream gene variant | 5 prime UTR variant                      | Jamshidi et al.                       |                   |

291 Table 2. Pathogenic variants previously considered intronic that are on  
 292 expressed transcripts in the retina *de novo* transcriptome. Canonical human  
 293 genome variation society (HGVS) annotation is based on transcripts from  
 294 the RefSeq annotation. Predicted consequences were generated with the  
 295 Variant Effect Predictor(VEP)

296 We used a list of 129 intronic and noncoding variants previously identified as  
 297 pathogenic for a retinal dystrophy and predicted the effect of these variants with Ensembl's  
 298 Variant Effect Predictor using a subset of the DNTX annotation corresponding to fetal and  
 299 adult retina as the input transcript annotation. We identified ten variants whose predicted  
 300 effect increased in severity due the presence of a novel gene isoform in a previously  
 301 intronic region (Table 2). Seven of these variants were in deep intronic hotspots known for  
 302 pathogenic variation within the gene ABCA4.



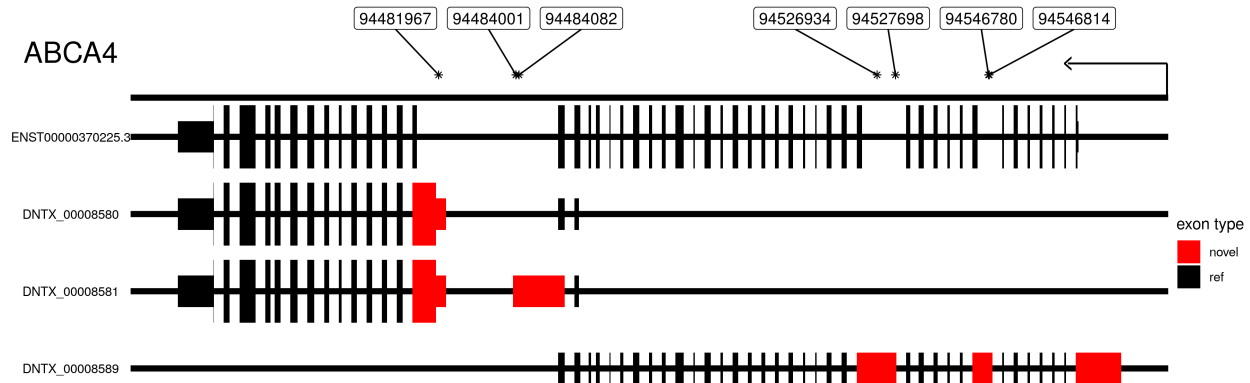

303

304

305

306

307

Figure 6. Transcript models for selected Isoforms of *ABCA4* along with location of pathogenic intronic variants. Location is on the hg19 human genome build. Thick lines indicate protein coding regions. Arrow indicates direction of transcription. Introns not drawn to scale

308

309

310

311

312

313

314

These variants were spanned by three distinct novel isoforms with two containing open reading frames (ORFs) encoding only the carboxy-terminus of the canonical protein isoform, and one noncoding spanning the proximal half of the canonical isoform (Fig 6). *ABCA4* expression and function has also been observed in RPE (Lenis et al., 2018). However, we did not observe these transcripts in RPE, suggesting that these pathogenic variants are primarily affecting retinal-specific *ABCA4* transcripts. We note that these transcripts have not been experimentally validated.

315

316

317

318

319

320

To further highlight the potential importance of *de novo* transcriptomes for future genetic tests we determined how many genes associated with retinal disease from RetNet have novel isoforms ([sph.uth.edu/retnet/](http://sph.uth.edu/retnet/)). We found that within the set of genes with novel isoforms, there is significant enrichment of retinal disease genes (hypergeometric  $p$ value =  $3.4e-04$ ), with 220 out of 379 RetNet genes having a novel isoform. A full list of these genes is available in the Supplementary data(supplemental data 5).

## 321 A companion visualization tool enables easy use of *de novo* transcriptomes

A

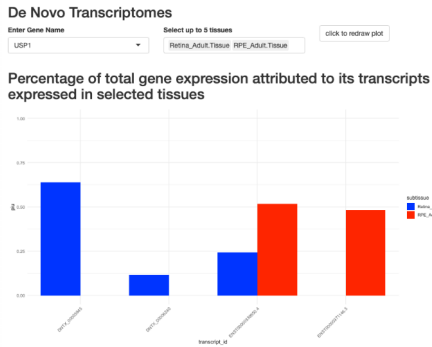

B

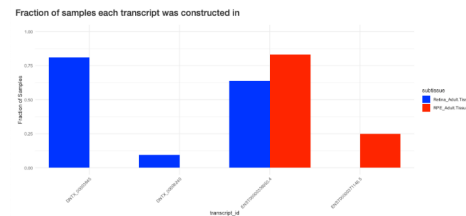

C

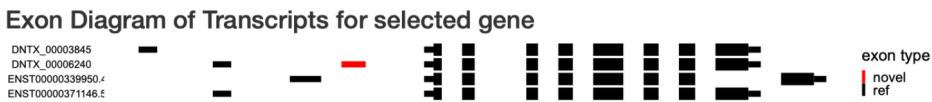

322

323 Figure 7. Screenshots from dynamic *de novo* transcriptome visualization  
324 tool. A). FIU bar plot for selected gene and subtissue. B). Exon level diagram  
325 of transcript body Thicklines represent coding region of transcript. novel  
326 exons colored in red. Tooltip contains genomic location and phylop score C)  
327 Bargraph of fraction of samples within dataset each transcript was  
328 constructed in by tissue.

329 To make our results easily accessible we designed a R-Shiny app for visualizing and  
330 accessing our *de novo* transcriptomes. For each subtissue we show the FIU for each  
331 transcript associated with a gene (Fig 7A). We show the exon-intron structure of each  
332 transcript and mousing over exons show genomic location overlapping SNPs, and

333 phylogenetic conservation score (Fig 7B). We additionally show a barplot of the fraction of  
334 samples each transcript was constructed in (Fig 7C). Users can also download the *de novo*  
335 transcriptomes for selected subtissues in GTF and fasta format. Instructions to download  
336 and run the app are available at [https://github.com/vinay-](https://github.com/vinay-swamy/ocular_transcriptomes_shiny)  
337 [swamy/ocular\\_transcriptomes\\_shiny](https://github.com/vinay-swamy/ocular_transcriptomes_shiny). While visualization of direct transcript expression is  
338 not a part of this app, it can be viewed in the eyeIntegration app (Swamy and McGaughey,  
339 2019) by selected 'DNTX' as the transcript annotation. Finally, we provide all code as a  
340 Snakemake workflow and provide a Docker container with all software required for the  
341 pipeline available at [https://github.com/vinay-swamy/ocular\\_transcriptomes\\_pipeline](https://github.com/vinay-swamy/ocular_transcriptomes_pipeline)

## 342 Discussion

343 Motivated by the lack of a comprehensive transcriptome for the eye, we constructed  
344 transcriptomes for adult and fetal retina, RPE and cornea. By using long-read RNA-seq data  
345 to calibrate our short-read construction pipeline, we were able to identify biologically  
346 relevant transcriptomes. We found that concordance between long and short-read-based  
347 transcriptomes is directly related to transcript length and transcript expression. We saw a  
348 clear inability within the PacBio data set to accurately detect transcripts shorter than  
349 2000bp for both previously annotated and novel transcripts. As many of the transcripts  
350 constructed using short-reads are below this threshold, long-read sequencing data  
351 enriched for smaller transcript sizes would provide greater insight in future studies.

352 We used a large dataset compiled from published RNA-seq data to build the pan-eye  
353 transcriptomes, an approach that has several key advantages. First, the large sample size  
354 overcomes the noisy nature of RNA-seq data. Second, as the cohort is constructed from  
355 many independent studies, we are more confident that the transcriptomes accurately  
356 reflect the biology of their originating subtissue and are not a technical artifact due to  
357 preparation of the samples. As another line of evidence, the *de novo* transcriptomes match  
358 existing large scale data sets and are more conserved than existing annotations  
359 (Supplemental Figure 2).

360 In each ocular subtissue we examined, we found hundreds of novel gene isoforms,  
361 many of which were novel due to novel exons. Within ocular subtissues, these novel  
362 isoforms are most commonly specific to single subtissue. This makes sense as a majority of  
363 the exons in our *de novo* transcriptomes are first and last exons, which have been  
364 previously shown to significantly contribute to the tissue specificity of gene isoforms  
365 (Reyes and Huber, 2018). We also found that on average novel isoforms represent about  
366 20.584 % of their parent gene's expression. Future studies are needed to identify the  
367 function of these isoforms. One possibility is that some of these isoforms are only  
368 expressed in rare cell types, as transcript annotation was previously shown to be  
369 incomplete in rare cell types (Zhang et al., 2020). This especially makes sense in the retina  
370 which contain over a dozen distinct cell types, several of which contribute to 5% or less of  
371 the total cell population (Yan et al., 2020). As we imposed a strict expression filter as part  
372 of our transcriptome pipeline, we may have removed transcripts specific to rare cell types.

373 In conclusion, we created the first pan-eye transcriptome annotation and showed  
374 that it is useful in understanding the role of gene isoforms in ocular biology and improving  
375 the ability to diagnose inherited eye diseases. We hope this work is useful as a starting  
376 point for other researchers; [delete] to make the transcriptomes easily accessible to other  
377 researchers we designed a webapp both for visualization and to quickly access tissue-  
378 specific annotation files. We believe this project will enable other researchers to explore  
379 new research directions and answer long pending questions.

## 380 **Methods**

### 381 **Generation of PacBio long-read RNA sequencing data and Illumina short-read** 382 **RNA sequencing data**

383 Human iPSCs were differentiated into RPE using previously described protocols in  
384 (Bryan et al., 2018) and (May-Simera et al., 2018). iPSC-derived RPE (iPSC-RPE) cells at 42  
385 days post differentiation were lysed with TRIzol reagent (Thermo Fisher Scientific; cat #  
386 15596026) and total RNA was isolated using the Direct-zol RNA MiniPrep Kit (Zymo  
387 Research, Irvine, CA). 5-6  $\mu$ g total RNA that passed quality control metric (RIN >.9) were  
388 used for PacBio library preparation. For PacBio HiFi circular consensus sequencing(CCS),

389 libraries were prepared following the “Procedure-Checklist-Iso-Seq-Express-Template-  
390 Preparation-for-Sequel-and-Sequel-II-Systems” protocol. Two libraries were generated:  
391 one to capture transcripts 2 kilobases(kb) or smaller, and one to capture transcripts  
392 between 2-5kb. Sequencing was done on the PacBio Sequel II system for a movie time of 24  
393 hours.

394 For Illumina sequencing, Poly-A selected stranded mRNA libraries were constructed  
395 from 0.5-1 µg total RNA using the Illumina TruSeq Stranded mRNA Sample Prep Kits  
396 according to manufacturer’s instructions. Amplification was performed using 10-12 cycles  
397 to minimize the risk of over-amplification. Unique dual-indexed barcode adapters were  
398 applied to each library. Libraries were pooled in equimolar ratio and sequenced together  
399 on a HiSeq 4000. At least 57 million 75-base read pairs were generated for each individual  
400 library. Data was processed using illumina Real Time Analysis (RTA) version 2.7.7. All  
401 library preparation and sequencing was performed at the National Institutes of Health  
402 Intramural Sequencing Center (NISC).

#### 403 **Code availability and software versions.**

404 To improve reproducibility, all code used for both the analyzing the data and  
405 generating the figures for this paper was written as multiple Snakemake pipelines. Each  
406 Snakefile contains the exact parameters for all tools and scripts used in each analysis.  
407 (Köster and Rahmann, 2012) All code (and versions) used for this project is publicly  
408 available in the following github repositories: [https://github.com/vinay-  
409 swamy/ocular\\_transcriptomes\\_pipeline](https://github.com/vinay-swamy/ocular_transcriptomes_pipeline) (main pipeline), [https://github.com/vinay-  
410 swamy/ocular\\_transcriptomes\\_longread\\_analysis](https://github.com/vinay-swamy/ocular_transcriptomes_longread_analysis) (long-read analysis pipeline),  
411 [https://github.com/vinay-swamy/ocular\\_transcriptomes\\_paper](https://github.com/vinay-swamy/ocular_transcriptomes_paper) (figures and tables for this  
412 paper), [https://github.com/vinay-swamy/ocular\\_transcriptomes\\_shiny](https://github.com/vinay-swamy/ocular_transcriptomes_shiny) (webapp).  
413 Additionally, all Snakefiles are included as supplementary data.(supplementary data files 1-  
414 3)

#### 415 **Analysis of long-read data**

416 PacBio sequencing movies were processed into full length, non-chimeric (FLNC)  
417 reads using the IsoSeq3 3.1.2 pipeline in the PacBio SMRT link v7.0 software. The existing

418 ENCODE long-read RNA-seq pipeline ([https://github.com/ENCODE-DCC/long-read-rna-](https://github.com/ENCODE-DCC/long-read-rna-pipeline)  
419 [pipeline](https://github.com/ENCODE-DCC/long-read-rna-pipeline)) was rewritten as a Snakemake workflow as follows. Transcripts were aligned to  
420 the human genome using minimap2(18), using an alignment index built on the gencode  
421 v28 primary human genome. Sequencing errors in aligned long-reads were corrected using  
422 TranscriptClean (19) with default parameters. Splice junctions for TranscriptClean were  
423 obtained using the TranscriptClean accessory script “get\_SJs\_from\_gtf.py” using the  
424 gencode v28 comprehensive transcript annotation as the input. A list of common variants  
425 to avoid correcting were obtained from the ENCODE portal  
426 (<https://www.encodeproject.org/files/ENCFF911UGW/>). The long-read transcriptome  
427 annotation was generated with TALON (20). A TALON database was generated using the  
428 `talon_initialize_database` command, with all default parameters, except for the “-5P” and “-  
429 3p” parameters. These parameters represent the maximum distance between close 5’ start  
430 and 3’ ends of similar transcript to merge and were both set to 100 to match parameters  
431 used in later tools. Annotation in GTF format was generated using the `talon_create_GTF`  
432 command, and transcript abundance values were generated using the `talon_abundance`  
433 command.

#### 434 **Analysis of short-read RPE data**

435 Each sample was aligned to the Gencode release 28 hg38 human genome assembly  
436 using the genomic aligner STAR and the resulting BAM files were sorted using samtools  
437 sort (Frankish et al., 2019),(Dobin et al., 2013),(Li et al., 2009). For each sorted BAM file, a  
438 per-sample base transcriptome was constructed using StringTie with the Gencode v28  
439 comprehensive annotation as a guiding annotation (Frankish et al., 2019),(Pertea et al.,  
440 2015). All sample transcriptomes were merged with the long-read transcriptome using  
441 `gffcompare`(Pertea and Pertea, 2020) with default parameters. We note that the default  
442 values for the distance to merge similar 5’ starts and 3 ends of transcripts in `gffcompare` is  
443 the same to what we chose for TALON. We defined the metric construction accuracy, used  
444 to evaluate short-read transcriptome construction as the following:

$$445 \text{ Construction Accuracy} = \frac{\text{short read transcriptome} \cap \text{long read transcriptome}}{\text{short read transcriptome}}$$

## 446 **Construction of subtissue-specific transcriptomes.**

447 We constructed transcriptomes for 1217 samples in the Eye in a Disk(EiaD), a  
448 dataset generated from aggregating publically available healthy, unperturbed RNA-seq  
449 samples from 50 distinct locations of the body across 29 different studies. Specific  
450 information on how this dataset was generated is detailed in the methods from our  
451 previous work (Swamy and McGaughey, 2019). We constructed a transcriptome for each  
452 sample, and merged samples together to create 50 subtissue-specific transcriptomes. We  
453 define subtissue as a unique body location and are either temporally different versions of  
454 the same tissue(adult vs fetal tissue), or different regions of a larger tissue (cortex vs  
455 cerebellum in brain). Tissue refers to complete whole tissue (retina, brain, liver). For each  
456 subtissue-specific transcriptome, we removed transcripts that had an average expression  
457 less than 1 Transcripts Per Million (TPM) across all samples of the same subtissue type. All  
458 subtissue-specific transcriptomes were merged to form a single unified annotation file in  
459 general transfer format(GTF) to ensure transcript identifiers were the same across  
460 subtissues. We merged all ocular subtissue transcriptomes to generate a separate pan-eye  
461 transcriptome.

## 462 **Subtissue specific transcriptome quantification**

463 For each resulting subtissue specific transcriptome, we extracted transcript  
464 sequences using the tool gffread and used these sequences to build a subtissue-specific  
465 quantification index using the index mode of the alignment-free quantification tool Salmon  
466 (Pertea and Pertea, 2020), (Patro et al., 2017). For each sample, we quantified transcript  
467 expression using the quant mode of Salmon, using a sample's respective subtissue specific  
468 quantification index. We similarly quantified all ocular samples using the pan-eye  
469 transcriptome and the Gencode v28 reference transcriptome.

## 470 **Annotation of novel exons**

471 First, a comprehensive set of distinct, annotated exons was generated by merging  
472 exon annotation from gencode, ensembl, UCSC, and refseq. We then defined a novel exon as  
473 any exon within our transcriptomes that does not exactly match the chromosome, start,  
474 end and strand of an annotated exon. Novel exons were classified by splitting exons into 3

475 categories: first, last, and middle exons. We then extracted all annotated exon start and stop  
476 sites from our set of previously annotated exons. Novel middle exons that have an  
477 annotated start but an unannotated end were categorized as a novel alternative 3' end  
478 exons and similarly novel middle exons with an unannotated start but annotated end were  
479 categorized as a novel alternative 5' start exons. Novel middle exons whose start and end  
480 match annotated exon start and ends were considered retained introns. Novel middle  
481 exons whose start and end do not match annotated starts and ends were considered fully  
482 novel exons. We then classified novel first and last exons. Novel first exons were first exons  
483 whose start is not in the set of annotated exon starts, and novel last exons were terminal  
484 exons whose end is not in the set of annotated exon ends. This analysis of novel transcripts  
485 is implemented in our Rscript "annotate\_and\_make\_tissue\_gtfs.R".

#### 486 **Validation of DNTX with phyloP, CAGE data, and polyA signals**

487 PhyloP scores for the phyloP 20-way multi species alignment were downloaded  
488 from UCSC's FTP server on October 16th, 2019 and converted from bigWig format to bed  
489 format using the wig2bed tool in BEDOPs (Pollard et al., 2010), (Neph et al., 2012). The  
490 average score per exon in both the gencode and DNTX annotation was calculated by  
491 intersecting exon locations with phyloP scores and then averaging the per base score for  
492 each exon, using the intersect and groupby tools from the bedtools suite, respectively.  
493 Significant difference in mean phyloP score was tested with a Mann Whitney U test.

494 CAGE peaks were download from the FANTOM FTP server  
495 ([https://fantom.gsc.riken.jp/5/datafiles/reprocessed/hg38\\_latest/extra/CAGE\\_peaks/hg38\\_fair+new\\_CAGE\\_peaks\\_phase1and2.bed.gz](https://fantom.gsc.riken.jp/5/datafiles/reprocessed/hg38_latest/extra/CAGE_peaks/hg38_fair+new_CAGE_peaks_phase1and2.bed.gz)) on June 15th 2020 (Noguchi et al., 2017).  
496 Transcriptional start sites (TSS) were extracted from gencode and DNTX annotations; TSS  
497 is defined as the start of the first exon of a transcript. Distance to CAGE peaks was  
498 calculated using the closest tool in the bedtools suite. Significant difference in mean  
499 distance to CAGE peak between DNTX and gencode annotation was tested with a Mann  
500 Whitney U test.  
501

502 Polyadenylation signal annotations were downloaded from the polyA site atlas  
503 (<https://polyasite.unibas.ch/download/atlas/2.0/GRCh38.96/atlas.clusters.2.0.GRCh38.96>)



504 [.bed.gz](#)) on June 15th 2020 (Herrmann et al., 2020). Transcriptional end sites(TES) were  
505 extracted from gencode and DNTX annotations; TES is defined as the end of the terminal  
506 exon of a transcript. Distance to polyA signal was calculated using the closest tool in the  
507 bedtools suite (Quinlan and Hall, 2010). Significant difference in mean distance to polyA  
508 signal was tested with a Mann Whitney U test.

### 509 **Identification of novel protein coding transcripts**

510 Protein-coding transcripts in the unified transcriptome were identified using the  
511 TransDecoder suite (Haas et al., 2013). Transcript sequences in fasta format were extracted  
512 from the final pan-body transcriptome using the TransDecoder util script  
513 “gtf\_genome\_to\_cdna\_fasta.pl”. Potential open reading frames(ORFs) were generated from  
514 transcript sequences using the LongestORF module within TransDecoder, and the single  
515 best ORF for each transcript was extracted with the Predict module within Transdecoder.  
516 The resulting ORFs were mapped to genomic locations with the TransDecoder util script  
517 “gtf\_to\_alignment\_gff3.pl”. For each ORF start and stop codons were extracted with the  
518 script “agat\_sp\_add\_start\_stop.pl” scripts from the AGAT toolkit  
519 (<https://github.com/NBISweden/AGAT/>). Transcripts with no detectable ORF or missing a  
520 start or stop codon were labelled as noncoding.

### 521 **Analysis of novel isoforms in eye tissues**

522 An Upset plot was generated using the ComplexUpset package  
523 (<https://github.com/krassowski/complex-upset>) (Lex et al., 2014). Fraction Isoform Usage  
524 (FIU) was calculated for each transcript  $t$  associated with a parent gene  $g$  using the  
525 following formula:  $FIU_t = \frac{TPM_t}{TPM_g}$ . Raincloud plots of FIU were generated using the  
526 “R\_Rainclouds” R package (Allen et al., 2019).

### 527 **Analysis of fetal retina RNA-seq data.**

528 RNA-seq samples from Mellough et al. were obtained from EiaD, and were not  
529 included in the main dataset used for building transcriptomes. Outliers within the dataset  
530 were identified by first performing principal component analysis of transcript level  
531 expression data, calculating the center of all data using the first two principal components,

532 and subsequently removing five samples furthest away from the center of all data. The  
533 remaining samples were normalized using calcNormFactors from the R package edgeR and  
534 converted to weights using the voom function from the R package limma (Robinson et al.,  
535 2010), (Ritchie et al., 2015). Differential expression was modeled using the lmFit function  
536 using developmental time point as the model design and tested for significant change in  
537 expression using the Ebayes function from limma. Gene Set enrichment was tested using  
538 the R package clusterprofileR (Yu et al., 2012). Heatmaps were generated using the  
539 ComplexHeatmap package (Gu et al., 2016).

#### 540 **Prediction of variant impact using *de novo* transcriptomes.**

541 Noncoding variants previously associated with retinal disease from the Blueprint  
542 Genetics Retinal dystrophy panel were obtained from the Blueprint Genetics website  
543 (<https://blueprintgenetics.com/tests/panels/ophthalmology/retinal-dystrophy-panel/>).  
544 The variants were converted from HGVS to VCF format using a custom python script  
545 “HGVS\_to\_VCF.py”. This VCF was then remapped to the hg38 human genome build using  
546 the tool crossmap (Zhao et al., 2014). The VCF of variants was used as the input variants for  
547 the Variant Effect Predictor(VEP) tool from Ensembl, with each subtissue specific  
548 transcriptome as the input annotation (McLaren et al., 2016). VEP was additionally run  
549 using the gencode v28 comprehensive annotation as the input annotation to identify  
550 variants whose predicted impact increased in severity.

#### 551 **Figures, Tables, and Computing Resources**

552 All statistical analyses, figures and tables in this paper were generated using the R  
553 programming language. (R Core Team, 2019) A full list of packages and versions can be  
554 found in the supplementary file session\_info.txt. All computation was performed on the  
555 National Institutes of Health high performance computer system Biowulf (hpc.nih.gov).

#### 556 **Competing Interests**

557 All authors declare no Competing interests.

558 **Supplemental Figures**

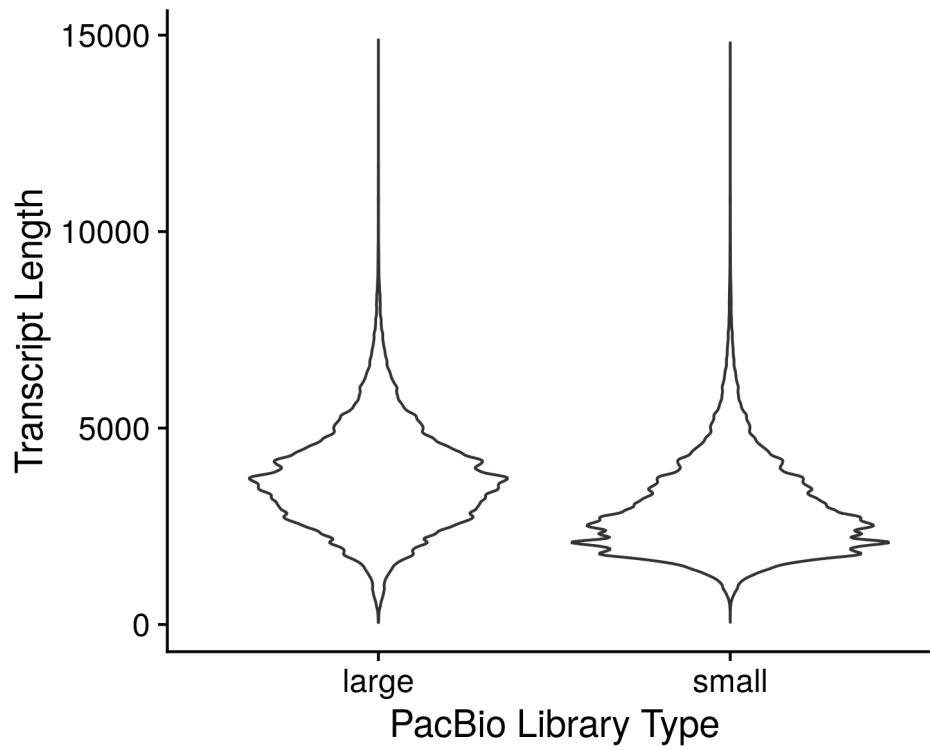

559

560  
561

Supplemental Figure 1. Distribution of PacBio long-read lengths for two library sizes.

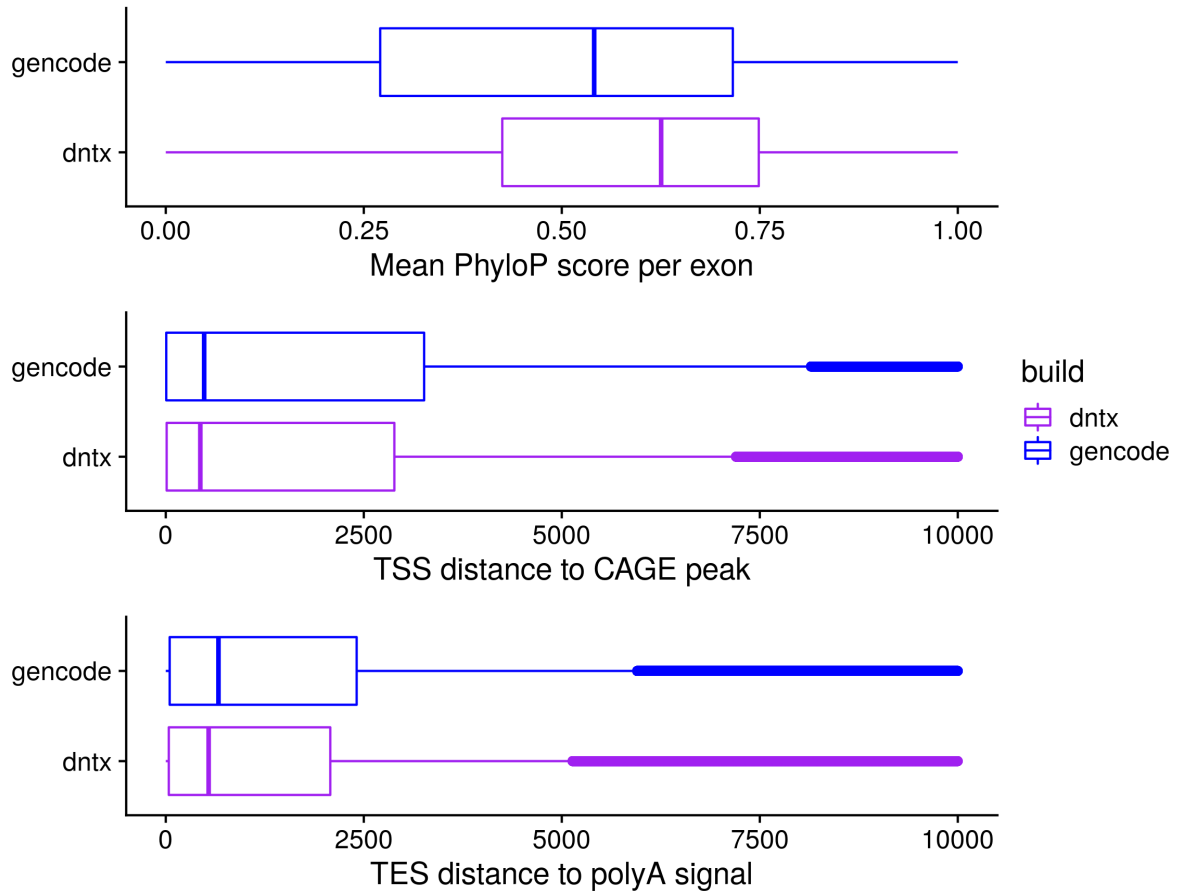

562

563

564

565

566

567

568

Supplemental Figure 2. Comparison of DNTX annotation to Gencode annotation. A) Average per exon PhyloP score for Gencode and DNTX transcripts. B) Average distance of DNTX transcriptional start sites (TSS) and Gencode TSS to CAGE-seq peaks from the FANTOM consortium. C) Average distance of DNTX transcriptional end sites (TES) and Gencode TES to polyadenylation signals in the PolyA site atlas.

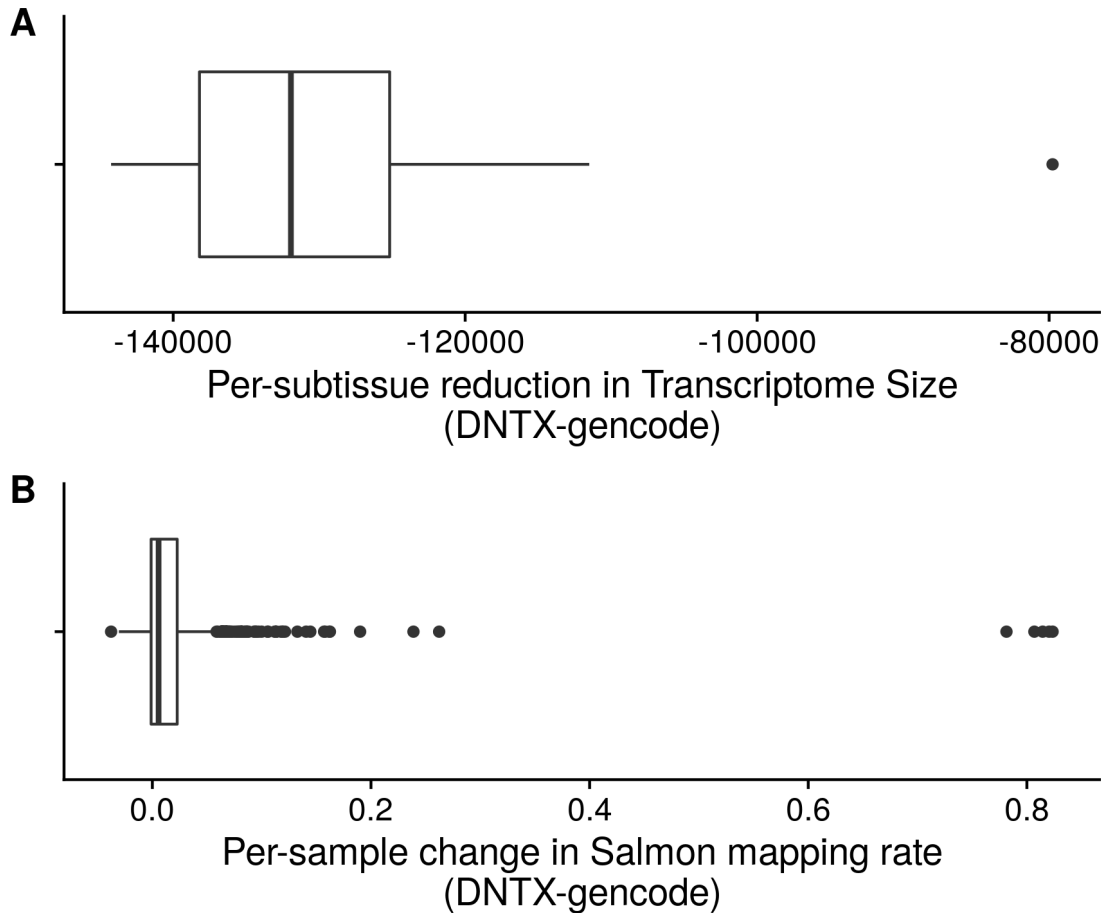

569

570

571

Supplemental Figure 3. Comparison of Salmon mapping rate change vs transcriptome size decrease.

## 572 References

573 Allen M, Poggiali D, Whitaker K, Marshall TR, Kievit RA. 2019. Raincloud plots: A multi-  
574 platform tool for robust data visualization. *Wellcome Open Research* 4:63.

575 doi:[10.12688/wellcomeopenres.15191.1](https://doi.org/10.12688/wellcomeopenres.15191.1)

576 Bauwens M, Garanto A, Sangermano R, Naessens S, Weisschuh N, De Zaeytijd J, Khan M,  
577 Sadler F, Balikova I, Van Cauwenbergh C, Rosseel T, Bauwens J, De Leeneer K, De Jaegere S,  
578 Van Laethem T, De Vries M, Carss K, Arno G, Fakin A, Webster AR, Ravel de l'Argentière TJL  
579 de, Sznajer Y, Vuylsteke M, Kohl S, Wissinger B, Cherry T, Collin RWJ, Cremers FPM, Leroy  
580 BP, De Baere E. 2019. ABCA4-associated disease as a model for missing heritability in  
581 autosomal recessive disorders: Novel noncoding splice, cis-regulatory, structural, and  
582 recurrent hypomorphic variants. *Genetics in Medicine* 21:1761–1771. doi:[10.1038/s41436-  
583 018-0420-y](https://doi.org/10.1038/s41436-018-0420-y)

- 584 Beck AH, Weng Z, Witten DM, Zhu S, Foley JW, Lacroute P, Smith CL, Tibshirani R, Rijn M  
585 van de, Sidow A, West RB. 2010. 3'-End Sequencing for Expression Quantification (3SEQ)  
586 from Archival Tumor Samples. *PLOS ONE* **5**:e8768. doi:[10.1371/journal.pone.0008768](https://doi.org/10.1371/journal.pone.0008768)
- 587 Bharti K, Liu W, Csermely T, Bertuzzi S, Arnheiter H. 2008. Alternative promoter use in eye  
588 development: Complex role and regulation of the transcription factor MITF. *Development*  
589 (*Cambridge, England*) **135**:1169–1178. doi:[10.1242/dev.014142](https://doi.org/10.1242/dev.014142)
- 590 Blenkinsop TA, Saini JS, Maminishkis A, Bharti K, Wan Q, Banzon T, Lotfi M, Davis J, Singh D,  
591 Rizzolo LJ, Miller S, Temple S, Stern JH. 2015. Human Adult Retinal Pigment Epithelial Stem  
592 Cell-Derived RPE Monolayers Exhibit Key Physiological Characteristics of Native Tissue.  
593 *Investigative Ophthalmology & Visual Science* **56**:7085–7099. doi:[10.1167/iovs.14-16246](https://doi.org/10.1167/iovs.14-16246)
- 594 Braun TA, Mullins RF, Wagner AH, Andorf JL, Johnston RM, Bakall BB, Deluca AP, Fishman  
595 GA, Lam BL, Weleber RG, Cideciyan AV, Jacobson SG, Sheffield VC, Tucker BA, Stone EM.  
596 2013. Non-exomic and synonymous variants in ABCA4 are an important cause of Stargardt  
597 disease. *Human Molecular Genetics* **22**:5136–5145. doi:[10.1093/hmg/ddt367](https://doi.org/10.1093/hmg/ddt367)
- 598 Bryan JM, Fufa TD, Bharti K, Brooks BP, Hufnagel RB, McGaughey DM. 2018. Identifying  
599 core biological processes distinguishing human eye tissues with precise systems-level gene  
600 expression analyses and weighted correlation networks. *Human Molecular Genetics*  
601 **27**:3325–3339. doi:[10.1093/hmg/ddy239](https://doi.org/10.1093/hmg/ddy239)
- 602 Dobin A, Davis CA, Schlesinger F, Drenkow J, Zaleski C, Jha S, Batut P, Chaisson M, Gingeras  
603 TR. 2013. STAR: Ultrafast universal RNA-seq aligner. *Bioinformatics (Oxford, England)*  
604 **29**:15–21. doi:[10.1093/bioinformatics/bts635](https://doi.org/10.1093/bioinformatics/bts635)
- 605 Dykes IM, Bueren KL van, Scambler PJ. 2018. HIC2 regulates isoform switching during  
606 maturation of the cardiovascular system. *Journal of Molecular and Cellular Cardiology*  
607 **114**:29–37. doi:[10.1016/j.yjmcc.2017.10.007](https://doi.org/10.1016/j.yjmcc.2017.10.007)
- 608 Frankish A, Diekhans M, Ferreira A-M, Johnson R, Jungreis I, Loveland J, Mudge JM, Sisu C,  
609 Wright J, Armstrong J, Barnes I, Berry A, Bignell A, Carbonell Sala S, Chrast J, Cunningham F,  
610 Di Domenico T, Donaldson S, Fiddes IT, Garcia Giron C, Gonzalez JM, Grego T, Hardy M,  
611 Hourlier T, Hunt T, Izuogu OG, Lagarde J, Martin FJ, Martinez L, Mohanan S, Muir P, Navarro  
612 FCP, Parker A, Pei B, Pozo F, Ruffier M, Schmitt BM, Stapleton E, Suner M-M, Sycheva I,  
613 Uszczyńska-Ratajczak B, Xu J, Yates A, Zerbino D, Zhang Y, Aken B, Choudhary JS, Gerstein  
614 M, Guigo R, Hubbard TJP, Kellis M, Paten B, Reymond A, Tress ML, Flicek P. 2019. GENCODE  
615 reference annotation for the human and mouse genomes. *Nucleic acids research* **47**:D766–  
616 D773. doi:[10.1093/nar/gky955](https://doi.org/10.1093/nar/gky955)
- 617 Geoffroy V, Stoetzel C, Scheidecker S, Schaefer E, Perrault I, Bär S, Kröll A, Delbarre M, Antin  
618 M, Leuvrey A-S, Henry C, Blanché H, Decker E, Kloth K, Klaus G, Mache C, Martin-Coignard  
619 D, McGinn S, Boland A, Deleuze J-F, Friant S, Saunier S, Rozet J-M, Bergmann C, Dollfus H,  
620 Muller J. 2018. Whole-genome sequencing in patients with ciliopathies uncovers a novel  
621 recurrent tandem duplication in IFT140. *Human Mutation* **39**:983–992.  
622 doi:[10.1002/humu.23539](https://doi.org/10.1002/humu.23539)

- 623 Gorman SW, Haider NB, Grieshammer U, Swiderski RE, Kim E, Welch JW, Searby C, Leng S,  
624 Carmi R, Sheffield VC, Duhl DM. 1999. The Cloning and Developmental Expression of  
625 Unconventional Myosin IXA (MYO9A) a Gene in the Bardet-Biedl Syndrome (BBS4) Region  
626 at Chromosome 15q22-q23. *Genomics* **59**:150–160. doi:[10.1006/geno.1999.5867](https://doi.org/10.1006/geno.1999.5867)
- 627 GTEx Consortium, Laboratory, Data Analysis & Coordinating Center (LDACC)—Analysis  
628 Working Group, Statistical Methods groups—Analysis Working Group, Enhancing GTEx  
629 (eGTEx) groups, NIH Common Fund, NIH/NCI, NIH/NHGRI, NIH/NIMH, NIH/NIDA,  
630 Biospecimen Collection Source Site—NDRI, Biospecimen Collection Source Site—RPCI,  
631 Biospecimen Core Resource—VARI, Brain Bank Repository—University of Miami Brain  
632 Endowment Bank, Leidos Biomedical—Project Management, ELSI Study, Genome Browser  
633 Data Integration & Visualization—EBI, Genome Browser Data Integration & Visualization—  
634 UCSC Genomics Institute, University of California Santa Cruz, Lead analysts: Laboratory,  
635 Data Analysis & Coordinating Center (LDACC): NIH program management: Biospecimen  
636 collection: Pathology: eQTL manuscript working group: Battle A, Brown CD, Engelhardt BE,  
637 Montgomery SB. 2017. Genetic effects on gene expression across human tissues. *Nature*  
638 **550**:204–213. doi:[10.1038/nature24277](https://doi.org/10.1038/nature24277)
- 639 Gu Z, Eils R, Schlesner M. 2016. Complex heatmaps reveal patterns and correlations in  
640 multidimensional genomic data. *Bioinformatics* **32**:2847–2849.  
641 doi:[10.1093/bioinformatics/btw313](https://doi.org/10.1093/bioinformatics/btw313)
- 642 Haas BJ, Papanicolaou A, Yassour M, Grabherr M, Blood PD, Bowden J, Couger MB, Eccles D,  
643 Li B, Lieber M, MacManes MD, Ott M, Orvis J, Pochet N, Strozzi F, Weeks N, Westerman R,  
644 William T, Dewey CN, Henschel R, LeDuc RD, Friedman N, Regev A. 2013. De novo  
645 transcript sequence reconstruction from RNA-Seq: Reference generation and analysis with  
646 Trinity. *Nature protocols* **8**. doi:[10.1038/nprot.2013.084](https://doi.org/10.1038/nprot.2013.084)
- 647 Herrmann CJ, Schmidt R, Kanitz A, Artimo P, Gruber AJ, Zavolan M. 2020. PolyASite 2.0: A  
648 consolidated atlas of polyadenylation sites from 3' end sequencing. *Nucleic Acids Research*  
649 **48**:D174–D179. doi:[10.1093/nar/gkz918](https://doi.org/10.1093/nar/gkz918)
- 650 Jamshidi F, Place EM, Mehrotra S, Navarro-Gomez D, Maher M, Branham KE, Valkanas E,  
651 Cherry TJ, Lek M, MacArthur D, Pierce EA, Bujakowska KM. 2019. Contribution of non-  
652 coding mutations to RPGRIP1-mediated inherited retinal degeneration. *Genetics in medicine*  
653 : official journal of the American College of Medical Genetics **21**:694–704.  
654 doi:[10.1038/s41436-018-0104-7](https://doi.org/10.1038/s41436-018-0104-7)
- 655 Klimanskaya I, Hipp J, Rezai KA, West M, Atala A, Lanza R. 2004. Derivation and  
656 comparative assessment of retinal pigment epithelium from human embryonic stem cells  
657 using transcriptomics. *Cloning and Stem Cells* **6**:217–245. doi:[10.1089/clo.2004.6.217](https://doi.org/10.1089/clo.2004.6.217)
- 658 Köster J, Rahmann S. 2012. Snakemake—a scalable bioinformatics workflow engine.  
659 *Bioinformatics* **28**:2520–2522. doi:[10.1093/bioinformatics/bts480](https://doi.org/10.1093/bioinformatics/bts480)
- 660 Landry J-R, Mager DL, Wilhelm BT. 2003. Complex controls: The role of alternative  
661 promoters in mammalian genomes. *Trends in Genetics* **19**:640–648.  
662 doi:[10.1016/j.tig.2003.09.014](https://doi.org/10.1016/j.tig.2003.09.014)

- 663 Lenis TL, Hu J, Ng SY, Jiang Z, Sarfare S, Lloyd MB, Esposito NJ, Samuel W, Jaworski C, Bok D,  
664 Finnemann SC, Radeke MJ, Redmond TM, Travis GH, Radu RA. 2018. Expression of ABCA4  
665 in the retinal pigment epithelium and its implications for Stargardt macular degeneration.  
666 *Proceedings of the National Academy of Sciences* **115**:E11120–E11127.  
667 doi:[10.1073/pnas.1802519115](https://doi.org/10.1073/pnas.1802519115)
- 668 Lex A, Gehlenborg N, Strobel H, Vuillemot R, Pfister H. 2014. UpSet: Visualization of  
669 Intersecting Sets. *IEEE Transactions on Visualization and Computer Graphics* **20**:1983–1992.  
670 doi:[10.1109/TVCG.2014.2346248](https://doi.org/10.1109/TVCG.2014.2346248)
- 671 Li H, Handsaker B, Wysoker A, Fennell T, Ruan J, Homer N, Marth G, Abecasis G, Durbin R,  
672 1000 Genome Project Data Processing Subgroup. 2009. The Sequence Alignment/Map  
673 format and SAMtools. *Bioinformatics (Oxford, England)* **25**:2078–2079.  
674 doi:[10.1093/bioinformatics/btp352](https://doi.org/10.1093/bioinformatics/btp352)
- 675 Maruotti J, Sripathi SR, Bharti K, Fuller J, Wahlin KJ, Ranganathan V, Sluch VM, Berlinicke  
676 CA, Davis J, Kim C, Zhao L, Wan J, Qian J, Corneo B, Temple S, Dubey R, Olenyuk BZ, Bhutto I,  
677 Luty GA, Zack DJ. 2015. Small-molecule-directed, efficient generation of retinal pigment  
678 epithelium from human pluripotent stem cells. *Proceedings of the National Academy of  
679 Sciences* **112**:10950–10955. doi:[10.1073/pnas.1422818112](https://doi.org/10.1073/pnas.1422818112)
- 680 Mayer AK, Rohrschneider K, Strom TM, Glöckle N, Kohl S, Wissinger B, Weisschuh N. 2016.  
681 Homozygosity mapping and whole-genome sequencing reveals a deep intronic PROM1  
682 mutation causing cone-rod dystrophy by pseudoexon activation. *European Journal of  
683 Human Genetics* **24**:459–462. doi:[10.1038/ejhg.2015.144](https://doi.org/10.1038/ejhg.2015.144)
- 684 May-Simera HL, Wan Q, Jha BS, Hartford J, Khristov V, Dejene R, Chang J, Patnaik S, Lu Q,  
685 Banerjee P, Silver J, Insinna-Kettenhofen C, Patel D, Lotfi M, Malicdan M, Hotaling N,  
686 Maminishkis A, Sridharan R, Brooks B, Miyagishima K, Gunay-Aygun M, Pal R, Westlake C,  
687 Miller S, Sharma R, Bharti K. 2018. Primary Cilium-Mediated Retinal Pigment Epithelium  
688 Maturation Is Disrupted in Ciliopathy Patient Cells. *Cell reports* **22**:189–205.  
689 doi:[10.1016/j.celrep.2017.12.038](https://doi.org/10.1016/j.celrep.2017.12.038)
- 690 McLaren W, Gil L, Hunt SE, Riat HS, Ritchie GRS, Thormann A, Flicek P, Cunningham F.  
691 2016. The Ensembl Variant Effect Predictor. *Genome Biology* **17**:122. doi:[10.1186/s13059-  
692 016-0974-4](https://doi.org/10.1186/s13059-016-0974-4)
- 693 Mellough CB, Bauer R, Collin J, Dorgau B, Zerti D, Dolan DWP, Jones CM, Izuogu OG, Yu M,  
694 Hallam D, Steyn JS, White K, Steel DH, Santibanez-Koref M, Elliott DJ, Jackson MS, Lindsay S,  
695 Grellscheid S, Lako M. 2019. An integrated transcriptional analysis of the developing  
696 human retina. *Development (Cambridge, England)* **146**. doi:[10.1242/dev.169474](https://doi.org/10.1242/dev.169474)
- 697 Mills JD, Nalpathamkalam T, Jacobs HIL, Janitz C, Merico D, Hu P, Janitz M. 2013. RNA-Seq  
698 analysis of the parietal cortex in Alzheimer's disease reveals alternatively spliced isoforms  
699 related to lipid metabolism. *Neuroscience Letters* **536**:90–95.  
700 doi:[10.1016/j.neulet.2012.12.042](https://doi.org/10.1016/j.neulet.2012.12.042)



- 701 Mitra M, Lee HN, Collier HA. 2020. Splicing Busts a Move: Isoform Switching Regulates  
702 Migration. *Trends in Cell Biology* **30**:74–85. doi:[10.1016/j.tcb.2019.10.007](https://doi.org/10.1016/j.tcb.2019.10.007)
- 703 Nagalakshmi U, Wang Z, Waern K, Shou C, Raha D, Gerstein M, Snyder M. 2008. The  
704 Transcriptional Landscape of the Yeast Genome Defined by RNA Sequencing. *Science*  
705 **320**:1344–1349. doi:[10.1126/science.1158441](https://doi.org/10.1126/science.1158441)
- 706 Neagoe Ciprian, Kulke Michael, del Monte Federica, Gwathmey Judith K., de Tombe Pieter  
707 P., Hajjar Roger J., Linke Wolfgang A. 2002. Titin Isoform Switch in Ischemic Human Heart  
708 Disease. *Circulation* **106**:1333–1341. doi:[10.1161/01.CIR.0000029803.93022.93](https://doi.org/10.1161/01.CIR.0000029803.93022.93)
- 709 Neph S, Kuehn MS, Reynolds AP, Haugen E, Thurman RE, Johnson AK, Rynes E, Maurano  
710 MT, Vierstra J, Thomas S, Sandstrom R, Humbert R, Stamatoyannopoulos JA. 2012. BEDOPS:  
711 High-performance genomic feature operations. *Bioinformatics* **28**:1919–1920.  
712 doi:[10.1093/bioinformatics/bts277](https://doi.org/10.1093/bioinformatics/bts277)
- 713 Noguchi S, Arakawa T, Fukuda S, Furuno M, Hasegawa A, Hori F, Ishikawa-Kato S, Kaida K,  
714 Kaiho A, Kanamori-Katayama M, Kawashima T, Kojima M, Kubosaki A, Manabe R-i, Murata  
715 M, Nagao-Sato S, Nakazato K, Ninomiya N, Nishiyori-Sueki H, Noma S, Saijyo E, Saka A, Sakai  
716 M, Simon C, Suzuki N, Tagami M, Watanabe S, Yoshida S, Arner P, Axton RA, Babina M,  
717 Baillie JK, Barnett TC, Beckhouse AG, Blumenthal A, Bodega B, Bonetti A, Briggs J,  
718 Brombacher F, Carlisle AJ, Clevers HC, Davis CA, Detmar M, Dohi T, Edge ASB, Edinger M,  
719 Ehrlund A, Ekwall K, Endoh M, Enomoto H, Eslami A, Fagiolini M, Fairbairn L, Farach-  
720 Carson MC, Faulkner GJ, Ferrai C, Fisher ME, Forrester LM, Fujita R, Furusawa J-i,  
721 Geijtenbeek TB, Gingeras T, Goldowitz D, Guhl S, Guler R, Gustincich S, Ha TJ, Hamaguchi M,  
722 Hara M, Hasegawa Y, Herlyn M, Heutink P, Hitchens KJ, Hume DA, Ikawa T, Ishizu Y, Kai C,  
723 Kawamoto H, Kawamura YI, Kempfle JS, Kenna TJ, Kere J, Khachigian LM, Kitamura T, Klein  
724 S, Klinken SP, Knox AJ, Kojima S, Koseki H, Koyasu S, Lee W, Lennartsson A, Mackay-sim A,  
725 Mejhert N, Mizuno Y, Morikawa H, Morimoto M, Moro K, Morris KJ, Motohashi H, Mummery  
726 CL, Nakachi Y, Nakahara F, Nakamura T, Nakamura Y, Nozaki T, Ogishima S, Ohkura N,  
727 Ohno H, Ohshima M, Okada-Hatakeyama M, Okazaki Y, Orlando V, Ovchinnikov DA, Passier  
728 R, Patrikakis M, Pombo A, Pradhan-Bhatt S, Qin X-Y, Rehli M, Rizzu P, Roy S, Sajantila A,  
729 Sakaguchi S, Sato H, Satoh H, Savvi S, Saxena A, Schmidl C, Schneider C, Schulze-Tanzil GG,  
730 Schwegmann A, Sheng G, Shin JW, Sugiyama D, Sugiyama T, Summers KM, Takahashi N,  
731 Takai J, Tanaka H, Tatsukawa H, Tomoiu A, Toyoda H, Wetering M van de, Berg LM van den,  
732 Verardo R, Vijayan D, Wells CA, Winteringham LN, Wolvetang E, Yamaguchi Y, Yamamoto  
733 M, Yanagi-Mizuochi C, Yoneda M, Yonekura Y, Zhang PG, Zucchelli S, Abugessaisa I, Arner E,  
734 Harshbarger J, Kondo A, Lassmann T, Lizio M, Sahin S, Sengstag T, Severin J, Shimoji H,  
735 Suzuki M, Suzuki H, Kawai J, Kondo N, Itoh M, Daub CO, Kasukawa T, Kawaji H, Carninci P,  
736 Forrest ARR, Hayashizaki Y. 2017. FANTOM5 CAGE profiles of human and mouse samples.  
737 *Scientific Data* **4**:170112. doi:[10.1038/sdata.2017.112](https://doi.org/10.1038/sdata.2017.112)
- 738 O’Leary NA, Wright MW, Brister JR, Ciuffo S, Haddad D, McVeigh R, Rajput B, Robbertse B,  
739 Smith-White B, Ako-Adjei D, Astashyn A, Badretdin A, Bao Y, Blinkova O, Brover V,  
740 Chetvernin V, Choi J, Cox E, Ermolaeva O, Farrell CM, Goldfarb T, Gupta T, Haft D, Hatcher E,  
741 Hlavina W, Joardar VS, Kodali VK, Li W, Maglott D, Masterson P, McGarvey KM, Murphy MR,  
742 O’Neill K, Pujar S, Rangwala SH, Rausch D, Riddick LD, Schoch C, Shkeda A, Storz SS, Sun H,

- 743 Thibaud-Nissen F, Tolstoy I, Tully RE, Vatsan AR, Wallin C, Webb D, Wu W, Landrum MJ,  
744 Kimchi A, Tatusova T, DiCuccio M, Kitts P, Murphy TD, Pruitt KD. 2016. Reference sequence  
745 (RefSeq) database at NCBI: Current status, taxonomic expansion, and functional annotation.  
746 *Nucleic Acids Research* **44**:D733–745. doi:[10.1093/nar/gkv1189](https://doi.org/10.1093/nar/gkv1189)
- 747 Patro R, Duggal G, Love MI, Irizarry RA, Kingsford C. 2017. Salmon provides fast and bias-  
748 aware quantification of transcript expression. *Nature methods* **14**:417–419.  
749 doi:[10.1038/nmeth.4197](https://doi.org/10.1038/nmeth.4197)
- 750 Perrin RM, Konopatskaya O, Qiu Y, Harper S, Bates DO, Churchill AJ. 2005. Diabetic  
751 retinopathy is associated with a switch in splicing from anti- to pro-angiogenic isoforms of  
752 vascular endothelial growth factor. *Diabetologia* **48**:2422–2427. doi:[10.1007/s00125-005-1951-8](https://doi.org/10.1007/s00125-005-1951-8)  
753
- 754 Pertea G, Pertea M. 2020. GFF Utilities: GffRead and GffCompare. *F1000Research* **9**:304.  
755 doi:[10.12688/f1000research.23297.1](https://doi.org/10.12688/f1000research.23297.1)
- 756 Pertea M, Kim D, Pertea GM, Leek JT, Salzberg SL. 2016. Transcript-level expression  
757 analysis of RNA-seq experiments with HISAT, StringTie and Ballgown. *Nature Protocols*  
758 **11**:1650–1667. doi:[10.1038/nprot.2016.095](https://doi.org/10.1038/nprot.2016.095)
- 759 Pertea M, Pertea GM, Antonescu CM, Chang T-C, Mendell JT, Salzberg SL. 2015. StringTie  
760 enables improved reconstruction of a transcriptome from RNA-seq reads. *Nature*  
761 *Biotechnology* **33**:290–295. doi:[10.1038/nbt.3122](https://doi.org/10.1038/nbt.3122)
- 762 Pertea M, Shumate A, Pertea G, Varabyou A, Breitwieser FP, Chang Y-C, Madugundu AK,  
763 Pandey A, Salzberg SL. 2018. CHESS: A new human gene catalog curated from thousands of  
764 large-scale RNA sequencing experiments reveals extensive transcriptional noise. *Genome*  
765 *Biology* **19**:208. doi:[10.1186/s13059-018-1590-2](https://doi.org/10.1186/s13059-018-1590-2)
- 766 Pollard KS, Hubisz MJ, Rosenbloom KR, Siepel A. 2010. Detection of nonneutral substitution  
767 rates on mammalian phylogenies. *Genome Research* **20**:110–121.  
768 doi:[10.1101/gr.097857.109](https://doi.org/10.1101/gr.097857.109)
- 769 Quinlan AR, Hall IM. 2010. BEDTools: A flexible suite of utilities for comparing genomic  
770 features. *Bioinformatics (Oxford, England)* **26**:841–842.  
771 doi:[10.1093/bioinformatics/btq033](https://doi.org/10.1093/bioinformatics/btq033)
- 772 R Core Team. 2019. R: A Language and Environment for Statistical Computing. Vienna,  
773 Austria: R Foundation for Statistical Computing.
- 774 Reyes A, Huber W. 2018. Alternative start and termination sites of transcription drive most  
775 transcript isoform differences across human tissues. *Nucleic Acids Research* **46**:582–592.  
776 doi:[10.1093/nar/gkx1165](https://doi.org/10.1093/nar/gkx1165)
- 777 Ritchie ME, Phipson B, Wu D, Hu Y, Law CW, Shi W, Smyth GK. 2015. Limma powers  
778 differential expression analyses for RNA-sequencing and microarray studies. *Nucleic Acids*  
779 *Research* **43**:e47–e47. doi:[10.1093/nar/gkv007](https://doi.org/10.1093/nar/gkv007)

- 780 Robinson MD, McCarthy DJ, Smyth GK. 2010. edgeR: A Bioconductor package for  
781 differential expression analysis of digital gene expression data. *Bioinformatics* **26**:139–140.  
782 doi:[10.1093/bioinformatics/btp616](https://doi.org/10.1093/bioinformatics/btp616)
- 783 Sangermano R, Garanto A, Khan M, Runhart EH, Bauwens M, Bax NM, Born LI van den, Khan  
784 MI, Cornelis SS, Verheij JBG, Pott J-WR, Thiadens AAHJ, Klaver CCW, Puech B, Meunier I,  
785 Naessens S, Arno G, Fakin A, Carss KJ, Raymond FL, Webster AR, Dhaenens C-M, Stöhr H,  
786 Grassmann F, Weber BHF, Hoyng CB, De Baere E, Albert S, Collin RWJ, Cremers FPM. 2019.  
787 Deep-intronic ABCA4 variants explain missing heritability in Stargardt disease and allow  
788 correction of splice defects by antisense oligonucleotides. *Genetics in Medicine* **21**:1751–  
789 1760. doi:[10.1038/s41436-018-0414-9](https://doi.org/10.1038/s41436-018-0414-9)
- 790 Swamy V, McGaughey D. 2019. Eye in a Disk: eyeIntegratIon Human Pan-Eye and Body  
791 Transcriptome Database Version 1.0. *Investigative Ophthalmology & Visual Science*  
792 **60**:3236–3246. doi:[10.1167/iovs.19-27106](https://doi.org/10.1167/iovs.19-27106)
- 793 Takahashi H, Kato S, Murata M, Carninci P. 2012. CAGE- Cap Analysis Gene Expression: A  
794 protocol for the detection of promoter and transcriptional networks. *Methods in molecular*  
795 *biology (Clifton, NJ)* **786**:181–200. doi:[10.1007/978-1-61779-292-2\\_11](https://doi.org/10.1007/978-1-61779-292-2_11)
- 796 Tian B, Manley JL. 2017. Alternative polyadenylation of mRNA precursors. *Nature Reviews*  
797 *Molecular Cell Biology* **18**:18–30. doi:[10.1038/nrm.2016.116](https://doi.org/10.1038/nrm.2016.116)
- 798 Trapnell C, Williams BA, Pertea G, Mortazavi A, Kwan G, Baren MJ van, Salzberg SL, Wold BJ,  
799 Pachter L. 2010. Transcript assembly and quantification by RNA-Seq reveals unannotated  
800 transcripts and isoform switching during cell differentiation. *Nature Biotechnology* **28**:511–  
801 515. doi:[10.1038/nbt.1621](https://doi.org/10.1038/nbt.1621)
- 802 Vitting-Seerup K, Sandelin A. 2017. The Landscape of Isoform Switches in Human Cancers.  
803 *Molecular Cancer Research* **15**:1206–1220. doi:[10.1158/1541-7786.MCR-16-0459](https://doi.org/10.1158/1541-7786.MCR-16-0459)
- 804 Wang Y, Liu J, HUANG B, XU Y-M, LI J, HUANG L-F, LIN J, ZHANG J, MIN Q-H, YANG W-M,  
805 WANG X-Z. 2015. Mechanism of alternative splicing and its regulation. *Biomedical Reports*  
806 **3**:152–158. doi:[10.3892/br.2014.407](https://doi.org/10.3892/br.2014.407)
- 807 Wenger AM, Peluso P, Rowell WJ, Chang P-C, Hall RJ, Concepcion GT, Ebler J,  
808 Functammasan A, Kolesnikov A, Olson ND, Töpfer A, Alonge M, Mahmoud M, Qian Y, Chin C-  
809 S, Phillippy AM, Schatz MC, Myers G, DePristo MA, Ruan J, Marschall T, Sedlazeck FJ, Zook  
810 JM, Li H, Koren S, Carroll A, Rank DR, Hunkapiller MW. 2019. Accurate circular consensus  
811 long-read sequencing improves variant detection and assembly of a human genome. *Nature*  
812 *Biotechnology* **37**:1155–1162. doi:[10.1038/s41587-019-0217-9](https://doi.org/10.1038/s41587-019-0217-9)
- 813 Yan W, Peng Y-R, Zyl T van, Regev A, Shekhar K, Juric D, Sanes JR. 2020. Cell Atlas of The  
814 Human Fovea and Peripheral Retina. *Scientific Reports* **10**:9802. doi:[10.1038/s41598-020-  
815 66092-9](https://doi.org/10.1038/s41598-020-66092-9)

- 816 Yu G, Wang L-G, Han Y, He Q-Y. 2012. clusterProfiler: An R Package for Comparing  
817 Biological Themes Among Gene Clusters. *OMICS : a Journal of Integrative Biology* **16**:284–  
818 287. doi:[10.1089/omi.2011.0118](https://doi.org/10.1089/omi.2011.0118)
- 819 Zerbino DR, Achuthan P, Akanni W, Amode MR, Barrell D, Bhai J, Billis K, Cummins C, Gall A,  
820 Girón CG, Gil L, Gordon L, Haggerty L, Haskell E, Hourlier T, Izuogu OG, Janacek SH,  
821 Juettemann T, To JK, Laird MR, Lavidas I, Liu Z, Loveland JE, Maurel T, McLaren W, Moore B,  
822 Mudge J, Murphy DN, Newman V, Nuhn M, Ogeh D, Ong CK, Parker A, Patricio M, Riat HS,  
823 Schuilenburg H, Sheppard D, Sparrow H, Taylor K, Thormann A, Vullo A, Walts B, Zadissa A,  
824 Frankish A, Hunt SE, Kostadima M, Langridge N, Martin FJ, Muffato M, Perry E, Ruffier M,  
825 Staines DM, Trevanion SJ, Aken BL, Cunningham F, Yates A, Flicek P. 2018. Ensembl 2018.  
826 *Nucleic Acids Research* **46**:D754–D761. doi:[10.1093/nar/gkx1098](https://doi.org/10.1093/nar/gkx1098)
- 827 Zernant J, Xie Y, Ayuso C, Riveiro-Alvarez R, Lopez-Martinez M-A, Simonelli F, Testa F,  
828 Gorin MB, Strom SP, Bertelsen M, Rosenberg T, Boone PM, Yuan B, Ayyagari R, Nagy PL,  
829 Tsang SH, Gouras P, Collison FT, Lupski JR, Fishman GA, Allikmets R. 2014. Analysis of the  
830 ABCA4 genomic locus in Stargardt disease. *Human Molecular Genetics* **23**:6797–6806.  
831 doi:[10.1093/hmg/ddu396](https://doi.org/10.1093/hmg/ddu396)
- 832 Zhang D, Guelfi S, Garcia-Ruiz S, Costa B, Reynolds RH, D'Sa K, Liu W, Courtin T, Peterson A,  
833 Jaffe AE, Hardy J, Botía JA, Collado-Torres L, Ryten M. 2020. Incomplete annotation has a  
834 disproportionate impact on our understanding of Mendelian and complex neurogenetic  
835 disorders. *Science Advances* **6**:eaay8299. doi:[10.1126/sciadv.aay8299](https://doi.org/10.1126/sciadv.aay8299)
- 836 Zhao H, Sun Z, Wang J, Huang H, Kocher J-P, Wang L. 2014. CrossMap: A versatile tool for  
837 coordinate conversion between genome assemblies. *Bioinformatics (Oxford, England)*  
838 **30**:1006–1007. doi:[10.1093/bioinformatics/btt730](https://doi.org/10.1093/bioinformatics/btt730)
